# Supplementary material for: Multimodal imaging of biological tissues using combined MALDI and NAPA-LDI mass spectrometry for enhanced molecular coverage
Source: Royal Society of Chemistry journal article supplement (doi:10.1039/d0an00836b), 2020-01-01
Supplement: d0an00836b1.pdf [file d0an00836b1.pdf]

## Electronic Supplementary Information

for

### Multimodal Imaging of Biological Tissues Using Combined MALDI and NAPA-LDI

### Mass Spectrometry for Enhanced Molecular Coverage

Jarod A. Fincher<sup>1</sup>, Andrew R. Korte<sup>\*1</sup>, Sridevi Yadavilli<sup>2</sup>, Nicholas J. Morris<sup>3</sup>, and Akos Vertes<sup>\*1</sup>

<sup>1</sup>*Department of Chemistry, The George Washington University, Washington, DC 20052, USA*

<sup>2</sup>*Research Center for Genetic Medicine, Children's National Medical Center, Washington, DC 20010, USA*

<sup>3</sup>*UES, Inc., Beavercreek, OH 45432, USA*

\*Co-corresponding authors:

Akos Vertes

Email: [vertes@gwu.edu](mailto:vertes@gwu.edu)

ORCID: [0000-0001-5186-5352](https://orcid.org/0000-0001-5186-5352)

Andrew Korte

Email: [andrew.r.korte@gmail.com](mailto:andrew.r.korte@gmail.com)

ORCID: [0000-0003-4270-966X](https://orcid.org/0000-0003-4270-966X)

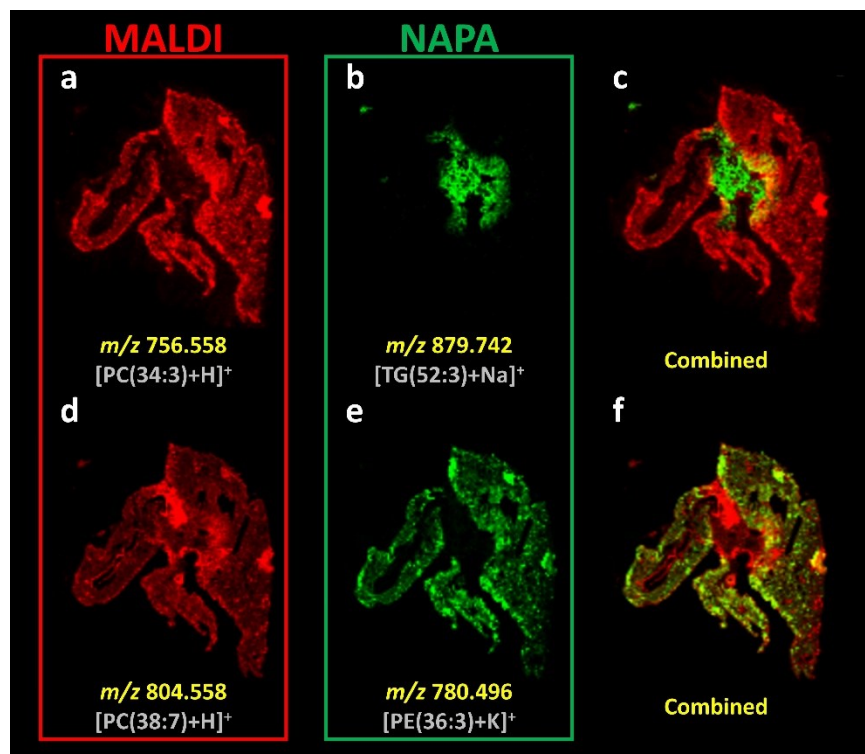

**Figure S1.** Overlaid chemical images from consecutive MALDI- and NAPA-LDI-MSI analysis of the same mouse lung tissue section. Images were overlaid using ImageJ software.

**Table S1.** Tentative lipid identifications based on mass accuracy tolerance of  $\Delta m/z \leq \pm 5$  mDa from analysis of mouse brain tissue sections analyzed by MALDI- and NAPA-LDI-MSI. For  $m/z$  values with multiple potential interpretations, all possibilities are listed.

| Sample      | Meas. $m/z$ | Calc. $m/z$ | $\Delta m$ (mDa) | Tentative identification               |
|-------------|-------------|-------------|------------------|----------------------------------------|
| Brain_MALDI | 305.1283    | 305.1280    | 0.3              | [ FA(14:0) +2K-H]+                     |
| Brain_MALDI | 319.1434    | 319.1436    | -0.2             | [ FA(15:0) +2K-H]+                     |
| Brain_MALDI | 331.1441    | 331.1436    | 0.5              | [ FA(16:1) +2K-H]+                     |
| Brain_MALDI | 333.1593    | 333.1593    | 0.0              | [ FA(16:0) +2K-H]+                     |
| Brain_MALDI | 361.1899    | 361.1906    | -0.7             | [ FA(18:0) +2K-H]+                     |
| Brain_MALDI | 369.3516    | 369.3516    | 0.0              | [ Cholesterol (-H <sub>2</sub> O) +H]+ |
| Brain_MALDI | 496.3403    | 496.3398    | 0.5              | [ LysoPC(16:0) +H]+                    |
| Brain_MALDI | 530.2020    | 530.2046    | -2.6             | [ LysoPE(16:0) +2K-H]+                 |
| Brain_MALDI | 570.2576    | 570.2567    | 0.9              | [ LysoPE(22:6) +2Na-H]+                |
| Brain_MALDI | 666.4839    | 666.4833    | 0.6              | [ CerP(d18:1/18:1) +Na]+               |
| Brain_MALDI | 682.4577    | 682.4572    | 0.4              | [ CerP(d18:1/18:1) +K]+                |
| Brain_MALDI | 697.4787    | 697.4803    | -1.6             | [ PA(36:4) +H]+                        |
| Brain_MALDI | 697.4787    | 697.4779    | 0.9              | [ PA(34:1) +Na]+                       |
| Brain_MALDI | 709.4198    | 709.4205    | -0.7             | [ PA(34:3) +K]+                        |
| Brain_MALDI | 713.4518    | 713.4518    | 0.0              | [ PA(34:1) +K]+                        |
| Brain_MALDI | 723.4941    | 723.4935    | 0.6              | [ PA(36:2) +Na]+                       |
| Brain_MALDI | 723.4941    | 723.4959    | -1.8             | [ PA(38:5) +H]+                        |
| Brain_MALDI | 725.3930    | 725.3921    | 1.0              | [ PA(32:0) +2K-H]+                     |
| Brain_MALDI | 725.5105    | 725.5116    | -1.1             | [ PA(38:4) +H]+                        |
| Brain_MALDI | 725.5105    | 725.5092    | 1.3              | [ PA(36:1) +Na]+                       |
| Brain_MALDI | 725.5577    | 725.5568    | 0.9              | [ SM(d34:1) +Na]+                      |
| Brain_MALDI | 735.4351    | 735.4362    | -1.0             | [ PA(36:4) +K]+                        |
| Brain_MALDI | 737.4536    | 737.4518    | 1.8              | [ PA(36:3) +K]+                        |
| Brain_MALDI | 739.4095    | 739.4101    | -0.6             | [ DG(40:9) +2K-H]+                     |
| Brain_MALDI | 739.4680    | 739.4675    | 0.5              | [ PA(36:2) +K]+                        |
| Brain_MALDI | 741.4858    | 741.4831    | 2.6              | [ PA(36:1) +K]+                        |
| Brain_MALDI | 741.5313    | 741.5307    | 0.5              | [ SM(d34:1) +K]+                       |
| Brain_MALDI | 745.4787    | 745.4755    | 3.2              | [ PA(36:2) +2Na-H]+                    |
| Brain_MALDI | 745.4787    | 745.4779    | 0.8              | [ PA(38:5) +Na]+                       |
| Brain_MALDI | 745.4787    | 745.4803    | -1.6             | [ PA(40:8) +H]+                        |
| Brain_MALDI | 748.5858    | 748.5851    | 0.8              | [ PE(36:0) +H]+                        |
| Brain_MALDI | 750.5834    | 750.5854    | -2.1             | [ HexCer(d36:1) +Na]+                  |
| Brain_MALDI | 751.4083    | 751.4077    | 0.6              | [ PA(34:1) +2K-H]+                     |
| Brain_MALDI | 751.5263    | 751.5272    | -1.0             | [ PA(40:5) +H]+                        |
| Brain_MALDI | 751.5263    | 751.5248    | 1.4              | [ PA(38:2) +Na]+                       |
| Brain_MALDI | 753.5892    | 753.5881    | 1.1              | [ SM(d36:1) +Na]+                      |
| Brain_MALDI | 753.5892    | 753.5905    | -1.3             | [ SM(d38:4) +H]+                       |
| Brain_MALDI | 756.5525    | 756.5538    | -1.3             | [ PC(34:3) +H]+                        |

| Sample      | Meas. m/z | Calc. m/z | $\Delta m$ (mDa) | Tentative identification |
|-------------|-----------|-----------|------------------|--------------------------|
| Brain_MALDI | 760.5863  | 760.5851  | 1.2              | [ PC(34:1) +H]+          |
| Brain_MALDI | 761.4521  | 761.4518  | 0.3              | [ PA(38:5) +K]+          |
| Brain_MALDI | 762.6020  | 762.6007  | 1.2              | [ PC(34:0) +H]+          |
| Brain_MALDI | 763.4684  | 763.4675  | 1.0              | [ PA(38:4) +K]+          |
| Brain_MALDI | 765.4848  | 765.4831  | 1.7              | [ PA(38:3) +K]+          |
| Brain_MALDI | 766.5527  | 766.5511  | 1.5              | [ CerP(d42:2) +K]+       |
| Brain_MALDI | 767.4991  | 767.4988  | 0.3              | [ PA(38:2) +K]+          |
| Brain_MALDI | 769.5627  | 769.5620  | 0.7              | [ SM(d36:1) +K]+         |
| Brain_MALDI | 770.5087  | 770.5097  | -0.9             | [ PC(32:1) +K]+          |
| Brain_MALDI | 770.5087  | 770.5071  | 1.6              | [ PE 36:3p +2Na-H]+      |
| Brain_MALDI | 770.5087  | 770.5095  | -0.8             | [ PE 38:6p +Na]+         |
| Brain_MALDI | 772.5263  | 772.5228  | 3.5              | [ PE 36:2p +2Na-H]+      |
| Brain_MALDI | 772.5263  | 772.5252  | 1.1              | [ PE 38:5p +Na]+         |
| Brain_MALDI | 774.6010  | 774.6007  | 0.2              | [ PE(38:1) +H]+          |
| Brain_MALDI | 775.5296  | 775.5272  | 2.4              | [ PA(42:7) +H]+          |
| Brain_MALDI | 777.4249  | 777.4234  | 1.5              | [ PA(36:2) +2K-H]+       |
| Brain_MALDI | 778.4766  | 778.4784  | -1.8             | [ PE(36:4) +K]+          |
| Brain_MALDI | 779.4410  | 779.4390  | 2.0              | [ PA(36:1) +2K-H]+       |
| Brain_MALDI | 780.4936  | 780.4940  | -0.4             | [ PE(36:3) +K]+          |
| Brain_MALDI | 782.5682  | 782.5694  | -1.3             | [ PC(36:4) +H]+          |
| Brain_MALDI | 782.5682  | 782.5670  | 1.1              | [ PC(34:1) +Na]+         |
| Brain_MALDI | 783.4582  | 783.4573  | 0.9              | [ PG(34:3) +K]+          |
| Brain_MALDI | 784.5271  | 784.5253  | 1.8              | [ PE(36:1) +K]+          |
| Brain_MALDI | 784.5838  | 784.5851  | -1.3             | [ PC(36:3) +H]+          |
| Brain_MALDI | 784.5838  | 784.5827  | 1.1              | [ PC(34:0) +Na]+         |
| Brain_MALDI | 785.4527  | 785.4518  | 0.9              | [ PA(40:7) +K]+          |
| Brain_MALDI | 787.4675  | 787.4675  | 0.0              | [ PA(40:6) +K]+          |
| Brain_MALDI | 789.4830  | 789.4831  | -0.1             | [ PA(40:5) +K]+          |
| Brain_MALDI | 794.4509  | 794.4499  | 1.0              | [ PE(34:1) +2K-H]+       |
| Brain_MALDI | 796.4674  | 796.4656  | 1.9              | [ PE(34:0) +2K-H]+       |
| Brain_MALDI | 796.5262  | 796.5253  | 0.9              | [ PC(34:2) +K]+          |
| Brain_MALDI | 796.5262  | 796.5228  | 3.5              | [ PE 38:4p +2Na-H]+      |
| Brain_MALDI | 797.5939  | 797.5933  | 0.5              | [ SM(d38:1) +K]+         |
| Brain_MALDI | 798.5422  | 798.5410  | 1.2              | [ PC(34:1) +K]+          |
| Brain_MALDI | 798.5422  | 798.5408  | 1.4              | [ PE 40:6p +Na]+         |
| Brain_MALDI | 798.5422  | 798.5384  | 3.8              | [ PE 38:3p +2Na-H]+      |
| Brain_MALDI | 800.4376  | 800.4393  | -1.8             | [ PE 36:4p +2K-H]+       |
| Brain_MALDI | 800.5591  | 800.5589  | 0.2              | [ PE 42:8p +H]+          |
| Brain_MALDI | 800.5591  | 800.5566  | 2.4              | [ PC(34:0) +K]+          |
| Brain_MALDI | 800.5591  | 800.5565  | 2.6              | [ PE 40:5p +Na]+         |
| Brain_MALDI | 801.4240  | 801.4234  | 0.7              | [ PA(38:4) +2K-H]+       |
| Brain_MALDI | 802.4796  | 802.4784  | 1.2              | [ PE(38:6) +K]+          |

| Sample      | Meas. m/z | Calc. m/z | $\Delta m$ (mDa) | Tentative identification |
|-------------|-----------|-----------|------------------|--------------------------|
| Brain_MALDI | 804.4904  | 804.4940  | -3.6             | [ PE(38:5) +K]+          |
| Brain_MALDI | 804.5524  | 804.5538  | -1.4             | [ PC(38:7) +H]+          |
| Brain_MALDI | 804.5524  | 804.5514  | 1.0              | [ PC(36:4) +Na]+         |
| Brain_MALDI | 804.5524  | 804.5490  | 3.4              | [ PC(34:1) +2Na-H]+      |
| Brain_MALDI | 806.5102  | 806.5097  | 0.5              | [ PE(38:4) +K]+          |
| Brain_MALDI | 808.4655  | 808.4656  | 0.0              | [ PC(32:1) +2K-H]+       |
| Brain_MALDI | 808.5828  | 808.5851  | -2.3             | [ PC(38:5) +H]+          |
| Brain_MALDI | 808.5828  | 808.5827  | 0.1              | [ PC(36:2) +Na]+         |
| Brain_MALDI | 809.6512  | 809.6507  | 0.5              | [ SM(d40:1) +Na]+        |
| Brain_MALDI | 810.5995  | 810.5983  | 1.2              | [ PC(36:1) +Na]+         |
| Brain_MALDI | 810.5995  | 810.6007  | -1.2             | [ PC(38:4) +H]+          |
| Brain_MALDI | 813.4834  | 813.4831  | 0.2              | [ PA(42:7) +K]+          |
| Brain_MALDI | 814.5123  | 814.5148  | -2.4             | [ PE 40:6p +K]+          |
| Brain_MALDI | 815.5184  | 815.5199  | -1.5             | [ PG(36:1) +K]+          |
| Brain_MALDI | 816.4354  | 816.4343  | 1.2              | [ PE(36:4) +2K-H]+       |
| Brain_MALDI | 820.4668  | 820.4656  | 1.2              | [ PE(36:2) +2K-H]+       |
| Brain_MALDI | 820.5258  | 820.5253  | 0.5              | [ PC(36:4) +K]+          |
| Brain_MALDI | 820.5258  | 820.5228  | 3.0              | [ PE 40:6p +2Na-H]+      |
| Brain_MALDI | 822.4828  | 822.4812  | 1.6              | [ PE(36:1) +2K-H]+       |
| Brain_MALDI | 822.4828  | 822.4868  | -4.0             | [ PI-Cer(d34:2) +2Na-H]+ |
| Brain_MALDI | 822.6441  | 822.6430  | 1.1              | [ HexCer(t40:1) +Na]+    |
| Brain_MALDI | 824.4386  | 824.4393  | -0.7             | [ PE 38:6p +2K-H]+       |
| Brain_MALDI | 824.5576  | 824.5566  | 1.0              | [ PC(36:2) +K]+          |
| Brain_MALDI | 824.5576  | 824.5565  | 1.1              | [ PE 42:7p +Na]+         |
| Brain_MALDI | 824.5576  | 824.5541  | 3.5              | [ PE 40:4p +2Na-H]+      |
| Brain_MALDI | 825.4227  | 825.4234  | -0.6             | [ PA(40:6) +2K-H]+       |
| Brain_MALDI | 825.6266  | 825.6246  | 1.9              | [ SM(d40:1) +K]+         |
| Brain_MALDI | 826.5729  | 826.5723  | 0.6              | [ PC(36:1) +K]+          |
| Brain_MALDI | 826.5729  | 826.5721  | 0.8              | [ PE 42:6p +Na]+         |
| Brain_MALDI | 826.5729  | 826.5697  | 3.2              | [ PE 40:3p +2Na-H]+      |
| Brain_MALDI | 828.4945  | 828.4940  | 0.5              | [ PE(40:7) +K]+          |
| Brain_MALDI | 828.4945  | 828.4973  | -2.8             | [ PI-Cer(t33:0) +2Na-H]+ |
| Brain_MALDI | 828.5555  | 828.5538  | 1.8              | [ PC(40:9) +H]+          |
| Brain_MALDI | 830.5104  | 830.5097  | 0.7              | [ PE(40:6) +K]+          |
| Brain_MALDI | 832.5838  | 832.5803  | 3.5              | [ PC(36:1) +2Na-H]+      |
| Brain_MALDI | 832.5838  | 832.5851  | -1.3             | [ PC(40:7) +H]+          |
| Brain_MALDI | 832.5838  | 832.5827  | 1.1              | [ PC(38:4) +Na]+         |
| Brain_MALDI | 832.6648  | 832.6637  | 1.2              | [ HexCer(d42:2) +Na]+    |
| Brain_MALDI | 834.6819  | 834.6793  | 2.5              | [ HexCer(d42:1) +Na]+    |
| Brain_MALDI | 836.4959  | 836.4969  | -0.9             | [ PC(34:1) +2K-H]+       |
| Brain_MALDI | 838.6170  | 838.6168  | 0.3              | [ PI-Cer(38:0) +H]+      |
| Brain_MALDI | 838.6170  | 838.6169  | 0.1              | [ HexCer(t40:1) +K]+     |

| Sample      | Meas. m/z | Calc. m/z | $\Delta m$ (mDa) | Tentative identification   |
|-------------|-----------|-----------|------------------|----------------------------|
| Brain_MALDI | 840.4352  | 840.4343  | 0.9              | [ PE(38:6) +2K-H]+         |
| Brain_MALDI | 842.4534  | 842.4499  | 3.5              | [ PE(38:5) +2K-H]+         |
| Brain_MALDI | 844.4664  | 844.4656  | 0.8              | [ PE(38:4) +2K-H]+         |
| Brain_MALDI | 844.5269  | 844.5253  | 1.5              | [ PC(38:6) +K]+            |
| Brain_MALDI | 844.5269  | 844.5228  | 4.1              | [ PE 42:8p +2Na-H]+        |
| Brain_MALDI | 846.4681  | 846.4682  | -0.1             | [ PS(38:6) +K]+            |
| Brain_MALDI | 846.5372  | 846.5384  | -1.2             | [ PE 42:7p +2Na-H]+        |
| Brain_MALDI | 846.5372  | 846.5410  | -3.8             | [ PC(38:5) +K]+            |
| Brain_MALDI | 848.5577  | 848.5541  | 3.7              | [ PE 42:6p +2Na-H]+        |
| Brain_MALDI | 848.5577  | 848.5566  | 1.1              | [ PC(38:4) +K]+            |
| Brain_MALDI | 848.6371  | 848.6376  | -0.6             | [ HexCer(d42:2) +K]+       |
| Brain_MALDI | 850.6759  | 850.6743  | 1.6              | [ HexCer(d42:1(2OH)) +Na]+ |
| Brain_MALDI | 856.5832  | 856.5803  | 2.9              | [ PC(38:3) +2Na-H]+        |
| Brain_MALDI | 856.5832  | 856.5827  | 0.5              | [ PC(40:6) +Na]+           |
| Brain_MALDI | 864.6331  | 864.6325  | 0.6              | [ HexCer(d42:2(2OH)) +K]+  |
| Brain_MALDI | 866.4502  | 866.4499  | 0.3              | [ PE(40:7) +2K-H]+         |
| Brain_MALDI | 866.6493  | 866.6482  | 1.1              | [ HexCer(d42:1(2OH)) +K]+  |
| Brain_MALDI | 866.6493  | 866.6481  | 1.2              | [ PI-Cer(40:0) +H]+        |
| Brain_MALDI | 868.4669  | 868.4656  | 1.3              | [ PE(40:6) +2K-H]+         |
| Brain_MALDI | 872.4980  | 872.4969  | 1.2              | [ PE(40:4) +2K-H]+         |
| Brain_MALDI | 872.5578  | 872.5566  | 1.2              | [ PC(40:6) +K]+            |
| Brain_MALDI | 874.5015  | 874.4995  | 2.0              | [ PS(40:6) +K]+            |
| Brain_MALDI | 912.4572  | 912.4554  | 1.8              | [ PS(40:6) +2K-H]+         |
| Brain_MALDI | 912.6398  | 912.6429  | -3.1             | [ PC(42:3) +2Na-H]+        |
| Brain_MALDI | 963.4779  | 963.4762  | 1.7              | [ PI(38:4) +2K-H]+         |
| Brain_NAPA  | 333.1594  | 333.1593  | 0.1              | [ FA(16:0) +2K-H]+         |
| Brain_NAPA  | 369.3516  | 369.3516  | 0.0              | [ Cholesterol (-H2O) +H]+  |
| Brain_NAPA  | 381.1585  | 381.1593  | -0.8             | [ FA(20:4) +2K-H]+         |
| Brain_NAPA  | 405.1594  | 405.1593  | 0.1              | [ FA(22:6) +2K-H]+         |
| Brain_NAPA  | 502.2702  | 502.2696  | 0.7              | [ Carnitine(18:1) +2K-H]+  |
| Brain_NAPA  | 544.2193  | 544.2202  | -1.0             | [ LysoPC(14:0) +2K-H]+     |
| Brain_NAPA  | 556.2189  | 556.2202  | -1.4             | [ LysoPE(18:1) +2K-H]+     |
| Brain_NAPA  | 558.2349  | 558.2359  | -1.0             | [ LysoPE(18:0) +2K-H]+     |
| Brain_NAPA  | 564.2489  | 564.2487  | 0.1              | [ LysoPE(22:6) +K]+        |
| Brain_NAPA  | 568.2804  | 568.2800  | 0.4              | [ LysoPE(22:4) +K]+        |
| Brain_NAPA  | 578.2046  | 578.2046  | 0.0              | [ LysoPE(20:4) +2K-H]+     |
| Brain_NAPA  | 584.2528  | 584.2515  | 1.2              | [ LysoPE(20:1) +2K-H]+     |
| Brain_NAPA  | 602.2048  | 602.2046  | 0.2              | [ LysoPE(22:6) +2K-H]+     |
| Brain_NAPA  | 602.3609  | 602.3583  | 2.7              | [ LysoPE(24:1) +K]+        |
| Brain_NAPA  | 604.5065  | 604.5066  | -0.1             | [ Cer(36:1) +K]+           |
| Brain_NAPA  | 620.5963  | 620.5976  | -1.4             | [ Cer(d40:2) +H]+          |
| Brain_NAPA  | 637.2727  | 637.2750  | -2.3             | [ LysoPI(18:1) +K]+        |

| Sample     | Meas. m/z | Calc. m/z | $\Delta m$ (mDa) | Tentative identification |
|------------|-----------|-----------|------------------|--------------------------|
| Brain_NAPA | 646.6124  | 646.6109  | 1.5              | [ Cer(d40:0) +Na]+       |
| Brain_NAPA | 648.6283  | 648.6289  | -0.6             | [ Cer(d42:2) +H]+        |
| Brain_NAPA | 670.6100  | 670.6109  | -0.9             | [ Cer(d42:2) +Na]+       |
| Brain_NAPA | 682.4572  | 682.4572  | -0.1             | [ CerP(d36:2) +K]+       |
| Brain_NAPA | 683.5005  | 683.5011  | -0.6             | [ DG(38:4) +K]+          |
| Brain_NAPA | 691.5261  | 691.5248  | 1.3              | [ DG(38:3) +2Na-H]+      |
| Brain_NAPA | 697.4768  | 697.4779  | -1.1             | [ PA(34:1) +Na]+         |
| Brain_NAPA | 709.4192  | 709.4205  | -1.4             | [ PA(34:3) +K]+          |
| Brain_NAPA | 709.5140  | 709.5168  | -2.7             | [ DG(40:5) +K]+          |
| Brain_NAPA | 710.3581  | 710.3560  | 2.1              | [ PE(28:1) +2K-H]+       |
| Brain_NAPA | 713.4518  | 713.4518  | 0.0              | [ PA(34:1) +K]+          |
| Brain_NAPA | 721.4751  | 721.4779  | -2.8             | [ PA(36:3) +Na]+         |
| Brain_NAPA | 721.4751  | 721.4755  | -0.4             | [ PA(34:0) +2Na-H]+      |
| Brain_NAPA | 723.4925  | 723.4935  | -1.1             | [ PA(36:2) +Na]+         |
| Brain_NAPA | 723.4925  | 723.4959  | -3.5             | [ PA(38:5) +H]+          |
| Brain_NAPA | 725.3930  | 725.3921  | 0.9              | [ PA(32:0) +2K-H]+       |
| Brain_NAPA | 729.4823  | 729.4855  | -3.2             | [ DG(42:9) +K]+          |
| Brain_NAPA | 730.4800  | 730.4784  | 1.6              | [ PE(32:0) +K]+          |
| Brain_NAPA | 735.4341  | 735.4362  | -2.1             | [ PA(36:4) +K]+          |
| Brain_NAPA | 737.4528  | 737.4518  | 1.0              | [ PA(36:3) +K]+          |
| Brain_NAPA | 739.4093  | 739.4101  | -0.7             | [ DG(40:9) +2K-H]+       |
| Brain_NAPA | 739.4671  | 739.4675  | -0.4             | [ PA(36:2) +K]+          |
| Brain_NAPA | 741.4855  | 741.4831  | 2.4              | [ PA(36:1) +K]+          |
| Brain_NAPA | 743.4858  | 743.4834  | 2.5              | [ PG(32:1) +Na]+         |
| Brain_NAPA | 747.3769  | 747.3764  | 0.5              | [ PA(34:3) +2K-H]+       |
| Brain_NAPA | 747.4727  | 747.4727  | 0.0              | [ DG(40:5) +2K-H]+       |
| Brain_NAPA | 748.4504  | 748.4527  | -2.3             | [ HexCer(d32:1) +2K-H]+  |
| Brain_NAPA | 748.5843  | 748.5851  | -0.8             | [ PE(36:0) +H]+          |
| Brain_NAPA | 749.5055  | 749.5036  | 1.9              | [ CE(20:4) +2K-H]+       |
| Brain_NAPA | 749.5055  | 749.5068  | -1.3             | [ PA(36:0) +2Na-H]+      |
| Brain_NAPA | 749.5055  | 749.5092  | -3.7             | [ PA(38:3) +Na]+         |
| Brain_NAPA | 750.4496  | 750.4471  | 2.5              | [ PE(34:4) +K]+          |
| Brain_NAPA | 750.5424  | 750.5408  | 1.6              | [ PE 36:2p +Na]+         |
| Brain_NAPA | 750.5424  | 750.5432  | -0.8             | [ PE 38:5p +H]+          |
| Brain_NAPA | 750.5846  | 750.5854  | -0.8             | [ HexCer(d36:1) +Na]+    |
| Brain_NAPA | 751.4079  | 751.4077  | 0.2              | [ PA(34:1) +2K-H]+       |
| Brain_NAPA | 751.5221  | 751.5248  | -2.7             | [ PA(38:2) +Na]+         |
| Brain_NAPA | 751.5221  | 751.5192  | 2.9              | [ CE(20:3) +2K-H]+       |
| Brain_NAPA | 753.5875  | 753.5905  | -3.1             | [ SM(d38:4) +H]+         |
| Brain_NAPA | 753.5875  | 753.5881  | -0.6             | [ SM(d36:1) +Na]+        |
| Brain_NAPA | 756.4937  | 756.4940  | -0.3             | [ PE(34:1) +K]+          |
| Brain_NAPA | 756.5509  | 756.5538  | -2.9             | [ PC(34:3) +H]+          |

| Sample     | Meas. m/z | Calc. m/z | $\Delta m$ (mDa) | Tentative identification  |
|------------|-----------|-----------|------------------|---------------------------|
| Brain_NAPA | 757.4192  | 757.4205  | -1.3             | [ PA(38:7) +K]+           |
| Brain_NAPA | 758.5103  | 758.5097  | 0.6              | [ PE(34:0) +K]+           |
| Brain_NAPA | 759.4360  | 759.4362  | -0.1             | [ PA(38:6) +K]+           |
| Brain_NAPA | 760.5851  | 760.5851  | 0.0              | [ PC(34:1) +H]+           |
| Brain_NAPA | 761.4511  | 761.4518  | -0.7             | [ PA(38:5) +K]+           |
| Brain_NAPA | 763.4664  | 763.4675  | -1.1             | [ PA(38:4) +K]+           |
| Brain_NAPA | 764.4027  | 764.4030  | -0.3             | [ PE(32:2) +2K-H]+        |
| Brain_NAPA | 764.5422  | 764.5437  | -1.5             | [ HexCer(d36:2) +K]+      |
| Brain_NAPA | 765.4846  | 765.4831  | 1.5              | [ PA(38:3) +K]+           |
| Brain_NAPA | 766.5136  | 766.5148  | -1.2             | [ PE 36:2p +K]+           |
| Brain_NAPA | 766.5589  | 766.5594  | -0.4             | [ HexCer(d36:1) +K]+      |
| Brain_NAPA | 767.4430  | 767.4414  | 1.6              | [ DG(42:9) +2K-H]+        |
| Brain_NAPA | 767.4979  | 767.4988  | -0.9             | [ PA(38:2) +K]+           |
| Brain_NAPA | 768.4367  | 768.4343  | 2.4              | [ PE(32:0) +2K-H]+        |
| Brain_NAPA | 768.5281  | 768.5304  | -2.3             | [ PE 36:1p +K]+           |
| Brain_NAPA | 769.4734  | 769.4755  | -2.1             | [ PA(38:4) +2Na-H]+       |
| Brain_NAPA | 770.5077  | 770.5097  | -2.0             | [ PC(32:1) +K]+           |
| Brain_NAPA | 770.5077  | 770.5095  | -1.8             | [ PE 38:6p +Na]+          |
| Brain_NAPA | 770.5077  | 770.5071  | 0.6              | [ PE 36:3p +2Na-H]+       |
| Brain_NAPA | 770.5636  | 770.5670  | -3.4             | [ PE(36:0) +Na]+          |
| Brain_NAPA | 772.5248  | 772.5228  | 2.0              | [ PE 36:2p +2Na-H]+       |
| Brain_NAPA | 772.5248  | 772.5252  | -0.4             | [ PE 38:5p +Na]+          |
| Brain_NAPA | 773.3925  | 773.3921  | 0.4              | [ PA(36:4) +2K-H]+        |
| Brain_NAPA | 774.6009  | 774.6007  | 0.1              | [ PE(38:1) +H]+           |
| Brain_NAPA | 775.4087  | 775.4077  | 1.0              | [ PA(36:3) +2K-H]+        |
| Brain_NAPA | 777.4230  | 777.4234  | -0.4             | [ PA(36:2) +2K-H]+        |
| Brain_NAPA | 778.4527  | 778.4550  | -2.2             | [ PE 34:1p +2K-H]+        |
| Brain_NAPA | 778.6163  | 778.6167  | -0.5             | [ HexCer(d38:1) +Na]+     |
| Brain_NAPA | 779.4389  | 779.4390  | -0.1             | [ PA(36:1) +2K-H]+        |
| Brain_NAPA | 779.5547  | 779.5561  | -1.4             | [ PA(40:2) +Na]+          |
| Brain_NAPA | 780.4932  | 780.4940  | -0.9             | [ PE(36:3) +K]+           |
| Brain_NAPA | 780.5373  | 780.5386  | -1.3             | [ HexCer(d36:2(2OH)) +K]+ |
| Brain_NAPA | 782.5101  | 782.5097  | 0.4              | [ PE(36:2) +K]+           |
| Brain_NAPA | 782.5552  | 782.5543  | 0.9              | [ HexCer(d36:1(2OH)) +K]+ |
| Brain_NAPA | 783.4334  | 783.4362  | -2.8             | [ PA(40:8) +K]+           |
| Brain_NAPA | 784.5267  | 784.5253  | 1.3              | [ PE(36:1) +K]+           |
| Brain_NAPA | 785.4508  | 785.4518  | -1.0             | [ PA(40:7) +K]+           |
| Brain_NAPA | 786.3900  | 786.3873  | 2.7              | [ PE(34:5) +2K-H]+        |
| Brain_NAPA | 786.4815  | 786.4835  | -1.9             | [ PE 38:6p +K]+           |
| Brain_NAPA | 787.4666  | 787.4675  | -0.9             | [ PA(40:6) +K]+           |
| Brain_NAPA | 788.4952  | 788.4991  | -3.9             | [ PE 38:5p +K]+           |
| Brain_NAPA | 790.5137  | 790.5148  | -1.0             | [ PE 38:4p +K]+           |



| Sample     | Meas. m/z | Calc. m/z | $\Delta m$ (mDa) | Tentative identification     |
|------------|-----------|-----------|------------------|------------------------------|
| Brain_NAPA | 792.4784  | 792.4789  | -0.5             | [ HexCer(d34:1(2OH)) +2K-H]+ |
| Brain_NAPA | 792.5282  | 792.5304  | -2.2             | [ PE 38:3p +K]+              |
| Brain_NAPA | 793.4956  | 793.4966  | -1.0             | [ PG(34:1) +2Na-H]+          |
| Brain_NAPA | 793.4956  | 793.4990  | -3.4             | [ PG(36:4) +Na]+             |
| Brain_NAPA | 794.4506  | 794.4499  | 0.7              | [ PE(34:1) +2K-H]+           |
| Brain_NAPA | 794.5454  | 794.5461  | -0.7             | [ PE 38:2p +K]+              |
| Brain_NAPA | 794.6118  | 794.6117  | 0.2              | [ HexCer(d38:1(2OH)) +Na]+   |
| Brain_NAPA | 795.3759  | 795.3764  | -0.5             | [ PA(38:7) +2K-H]+           |
| Brain_NAPA | 796.4673  | 796.4656  | 1.7              | [ PE(34:0) +2K-H]+           |
| Brain_NAPA | 796.5259  | 796.5228  | 3.1              | [ PE 38:4p +2Na-H]+          |
| Brain_NAPA | 796.5259  | 796.5253  | 0.6              | [ PC(34:2) +K]+              |
| Brain_NAPA | 797.3927  | 797.3921  | 0.7              | [ PA(38:6) +2K-H]+           |
| Brain_NAPA | 798.4667  | 798.4682  | -1.5             | [ PS(34:2) +K]+              |
| Brain_NAPA | 798.5404  | 798.5408  | -0.4             | [ PE 40:6p +Na]+             |
| Brain_NAPA | 798.5404  | 798.5410  | -0.6             | [ PC(34:1) +K]+              |
| Brain_NAPA | 798.5404  | 798.5384  | 2.0              | [ PE 38:3p +2Na-H]+          |
| Brain_NAPA | 799.4082  | 799.4077  | 0.5              | [ PA(38:5) +2K-H]+           |
| Brain_NAPA | 800.5572  | 800.5565  | 0.7              | [ PE 40:5p +Na]+             |
| Brain_NAPA | 800.5572  | 800.5541  | 3.1              | [ PE 38:2p +2Na-H]+          |
| Brain_NAPA | 800.5572  | 800.5566  | 0.6              | [ PC(34:0) +K]+              |
| Brain_NAPA | 800.5572  | 800.5589  | -1.7             | [ PE 42:8p +H]+              |
| Brain_NAPA | 801.4225  | 801.4234  | -0.9             | [ PA(38:4) +2K-H]+           |
| Brain_NAPA | 801.5635  | 801.5640  | -0.5             | [ PG(38:3) +H]+              |
| Brain_NAPA | 801.5635  | 801.5616  | 1.9              | [ PG(36:0) +Na]+             |
| Brain_NAPA | 802.4783  | 802.4784  | -0.1             | [ PE(38:6) +K]+              |
| Brain_NAPA | 804.4695  | 804.4706  | -1.1             | [ PE 36:2p +2K-H]+           |
| Brain_NAPA | 804.5498  | 804.5490  | 0.9              | [ PC(34:1) +2Na-H]+          |
| Brain_NAPA | 804.5498  | 804.5514  | -1.5             | [ PC(36:4) +Na]+             |
| Brain_NAPA | 804.5498  | 804.5538  | -3.9             | [ PC(38:7) +H]+              |
| Brain_NAPA | 804.6327  | 804.6324  | 0.3              | [ HexCer(d40:2) +Na]+        |
| Brain_NAPA | 806.5084  | 806.5097  | -1.3             | [ PE(38:4) +K]+              |
| Brain_NAPA | 806.6471  | 806.6480  | -0.9             | [ HexCer(d42:1) +Na]+        |
| Brain_NAPA | 808.4634  | 808.4656  | -2.2             | [ PC(32:1) +2K-H]+           |
| Brain_NAPA | 808.5692  | 808.5699  | -0.8             | [ HexCer(d38:2(2OH)) +K]+    |
| Brain_NAPA | 808.6304  | 808.6273  | 3.1              | [ HexCer(d39:1(2OH)) +Na]+   |
| Brain_NAPA | 810.5436  | 810.5410  | 2.6              | [ PE(38:2) +K]+              |
| Brain_NAPA | 810.5841  | 810.5856  | -1.5             | [ HexCer(d38:1(2OH)) +K]+    |
| Brain_NAPA | 811.4862  | 811.4886  | -2.4             | [ PG(36:3) +K]+              |
| Brain_NAPA | 813.5036  | 813.5043  | -0.6             | [ PG(36:2) +K]+              |
| Brain_NAPA | 814.5135  | 814.5148  | -1.2             | [ PE 40:6p +K]+              |
| Brain_NAPA | 816.4337  | 816.4343  | -0.6             | [ PE(36:4) +2K-H]+           |
| Brain_NAPA | 816.5286  | 816.5304  | -1.8             | [ PE 40:5p +K]+              |

| Sample     | Meas. m/z | Calc. m/z | $\Delta m$ (mDa) | Tentative identification  |
|------------|-----------|-----------|------------------|---------------------------|
| Brain_NAPA | 818.5454  | 818.5461  | -0.6             | [ PE 40:4p +K]+           |
| Brain_NAPA | 818.6482  | 818.6480  | 0.2              | [ HexCer(d41:2) +Na]+     |
| Brain_NAPA | 820.4654  | 820.4656  | -0.1             | [ PE(36:2) +2K-H]+        |
| Brain_NAPA | 820.5258  | 820.5228  | 3.0              | [ PE 40:6p +2Na-H]+       |
| Brain_NAPA | 820.5258  | 820.5253  | 0.5              | [ PC(36:4) +K]+           |
| Brain_NAPA | 820.6037  | 820.6063  | -2.7             | [ HexCer(d42:2) +K]+      |
| Brain_NAPA | 820.6037  | 820.6062  | -2.6             | [ PS(38:0) +H]+           |
| Brain_NAPA | 821.3937  | 821.3921  | 1.6              | [ PA(40:8) +2K-H]+        |
| Brain_NAPA | 822.4820  | 822.4812  | 0.8              | [ PE(36:1) +2K-H]+        |
| Brain_NAPA | 822.6444  | 822.6430  | 1.4              | [ HexCer(t40:1) +Na]+     |
| Brain_NAPA | 823.4074  | 823.4077  | -0.3             | [ PA(40:7) +2K-H]+        |
| Brain_NAPA | 824.4367  | 824.4393  | -2.7             | [ PE 38:6p +2K-H]+        |
| Brain_NAPA | 824.5559  | 824.5541  | 1.9              | [ PE 40:4p +2Na-H]+       |
| Brain_NAPA | 824.5559  | 824.5566  | -0.7             | [ PC(36:2) +K]+           |
| Brain_NAPA | 824.5559  | 824.5565  | -0.5             | [ PE 42:7p +Na]+          |
| Brain_NAPA | 824.6006  | 824.6012  | -0.6             | [ HexCer(d39:1(2OH)) +K]+ |
| Brain_NAPA | 825.4212  | 825.4234  | -2.1             | [ PA(40:6) +2K-H]+        |
| Brain_NAPA | 826.5724  | 826.5721  | 0.3              | [ PE 42:6p +Na]+          |
| Brain_NAPA | 826.5724  | 826.5697  | 2.7              | [ PE 40:3p +2Na-H]+       |
| Brain_NAPA | 826.5724  | 826.5723  | 0.1              | [ PC(36:1) +K]+           |
| Brain_NAPA | 827.4574  | 827.4601  | -2.8             | [ PG(34:0) +2K-H]+        |
| Brain_NAPA | 828.4933  | 828.4973  | -4.0             | [ PI-Cer(t33:0) +2Na-H]+  |
| Brain_NAPA | 828.4933  | 828.4940  | -0.7             | [ PE(40:7) +K]+           |
| Brain_NAPA | 830.5097  | 830.5097  | 0.1              | [ PE(40:6) +K]+           |
| Brain_NAPA | 830.6495  | 830.6456  | 3.9              | [ HexCer(d40:0) +2Na-H]+  |
| Brain_NAPA | 831.4342  | 831.4362  | -1.9             | [ PA(44:12) +K]+          |
| Brain_NAPA | 832.5020  | 832.5019  | 0.1              | [ PE 38:2p +2K-H]+        |
| Brain_NAPA | 832.5841  | 832.5851  | -1.0             | [ PC(40:7) +H]+           |
| Brain_NAPA | 832.5841  | 832.5827  | 1.4              | [ PC(38:4) +Na]+          |
| Brain_NAPA | 832.5841  | 832.5803  | 3.8              | [ PC(36:1) +2Na-H]+       |
| Brain_NAPA | 832.6634  | 832.6637  | -0.3             | [ HexCer(d42:2) +Na]+     |
| Brain_NAPA | 834.6184  | 834.6220  | -3.6             | [ HexCer(d41:2) +K]+      |
| Brain_NAPA | 834.6752  | 834.6793  | -4.2             | [ HexCer(d42:1) +Na]+     |
| Brain_NAPA | 836.4942  | 836.4969  | -2.6             | [ PC(34:1) +2K-H]+        |
| Brain_NAPA | 836.6038  | 836.6012  | 2.5              | [ HexCer(d42:2(2OH)) +K]+ |
| Brain_NAPA | 838.4414  | 838.4397  | 1.6              | [ PS(34:1) +2K-H]+        |
| Brain_NAPA | 838.5127  | 838.5148  | -2.0             | [ PE 42:8p +K]+           |
| Brain_NAPA | 838.5127  | 838.5125  | 0.2              | [ PC(34:0) +2K-H]+        |
| Brain_NAPA | 838.6164  | 838.6168  | -0.4             | [ PI-Cer(38:0) +H]+       |
| Brain_NAPA | 838.6164  | 838.6169  | -0.5             | [ HexCer(t40:1) +K]+      |
| Brain_NAPA | 840.4340  | 840.4343  | -0.3             | [ PE(38:6) +2K-H]+        |
| Brain_NAPA | 840.5281  | 840.5304  | -2.3             | [ PE 42:7p +K]+           |

| Sample     | Meas. m/z | Calc. m/z | $\Delta m$ (mDa) | Tentative identification    |
|------------|-----------|-----------|------------------|-----------------------------|
| Brain_NAPA | 842.4518  | 842.4499  | 1.9              | [ PE(38:5) +2K-H]+          |
| Brain_NAPA | 844.4653  | 844.4656  | -0.2             | [ PE(38:4) +2K-H]+          |
| Brain_NAPA | 844.5264  | 844.5253  | 1.0              | [ PC(38:6) +K]+             |
| Brain_NAPA | 844.5264  | 844.5228  | 3.6              | [ PE 42:8p +2Na-H]+         |
| Brain_NAPA | 846.4656  | 846.4682  | -2.6             | [ PS(38:6) +K]+             |
| Brain_NAPA | 846.5421  | 846.5410  | 1.2              | [ PC(38:5) +K]+             |
| Brain_NAPA | 846.5421  | 846.5384  | 3.7              | [ PE 42:7p +2Na-H]+         |
| Brain_NAPA | 848.4970  | 848.4929  | 4.1              | [ Sulfatide(d36:3) +2Na-H]+ |
| Brain_NAPA | 848.4970  | 848.4969  | 0.1              | [ PE(38:2) +2K-H]+          |
| Brain_NAPA | 848.5585  | 848.5566  | 1.9              | [ PC(38:4) +K]+             |
| Brain_NAPA | 848.6348  | 848.6376  | -2.8             | [ HexCer(d42:2) +K]+        |
| Brain_NAPA | 850.5109  | 850.5125  | -1.6             | [ PE(38:1) +2K-H]+          |
| Brain_NAPA | 850.5109  | 850.5086  | 2.4              | [ Sulfatide(d36:2) +2Na-H]+ |
| Brain_NAPA | 851.4586  | 851.4601  | -1.6             | [ PG(36:2) +2K-H]+          |
| Brain_NAPA | 854.4858  | 854.4863  | -0.5             | [ PE 40:5p +2K-H]+          |
| Brain_NAPA | 855.6332  | 855.6351  | -1.9             | [ SM(d44:6) +Na]+           |
| Brain_NAPA | 856.4983  | 856.5019  | -3.6             | [ PE 40:4p +2K-H]+          |
| Brain_NAPA | 856.5822  | 856.5803  | 1.9              | [ PC(38:3) +2Na-H]+         |
| Brain_NAPA | 856.5822  | 856.5827  | -0.5             | [ PC(40:6) +Na]+            |
| Brain_NAPA | 858.4826  | 858.4812  | 1.4              | [ PC(36:4) +2K-H]+          |
| Brain_NAPA | 860.6913  | 860.6950  | -3.7             | [ HexCer(d44:2) +Na]+       |
| Brain_NAPA | 861.5325  | 861.5366  | -4.1             | [ LysylPG(30:0) +K]+        |
| Brain_NAPA | 862.4423  | 862.4397  | 2.5              | [ PS(36:3) +2K-H]+          |
| Brain_NAPA | 862.5310  | 862.5333  | -2.3             | [ PE(42:7) +2Na-H]+         |
| Brain_NAPA | 862.6244  | 862.6272  | -2.8             | [ PC(38:0) +2Na-H]+         |
| Brain_NAPA | 862.6244  | 862.6250  | -0.6             | [ LacCer (d34:1) +H]+       |
| Brain_NAPA | 864.4545  | 864.4554  | -0.9             | [ PS(36:2) +2K-H]+          |
| Brain_NAPA | 864.6310  | 864.6325  | -1.6             | [ HexCer(d42:2(2OH)) +K]+   |
| Brain_NAPA | 866.4477  | 866.4499  | -2.2             | [ PE(40:7) +2K-H]+          |
| Brain_NAPA | 866.6459  | 866.6481  | -2.2             | [ PI-Cer(40:0) +H]+         |
| Brain_NAPA | 866.6459  | 866.6482  | -2.3             | [ HexCer(d42:1(2OH)) +K]+   |
| Brain_NAPA | 868.4639  | 868.4656  | -1.6             | [ PE(40:6) +2K-H]+          |
| Brain_NAPA | 869.3926  | 869.3921  | 0.5              | [ PA(44:12) +2K-H]+         |
| Brain_NAPA | 870.5392  | 870.5410  | -1.7             | [ PC(40:7) +K]+             |
| Brain_NAPA | 872.4969  | 872.4969  | 0.1              | [ PE(40:4) +2K-H]+          |
| Brain_NAPA | 872.5561  | 872.5566  | -0.6             | [ PC(40:6) +K]+             |
| Brain_NAPA | 874.5007  | 874.4995  | 1.2              | [ PS(40:6) +K]+             |
| Brain_NAPA | 874.5900  | 874.5935  | -3.5             | [ HexCer(d41:1) +2K-H]+     |
| Brain_NAPA | 876.6462  | 876.6429  | 3.3              | [ PE(42:0) +2Na-H]+         |
| Brain_NAPA | 878.6463  | 878.6482  | -1.9             | [ HexCer(d43:2(2OH)) +K]+   |
| Brain_NAPA | 880.4696  | 880.4656  | 4.1              | [ PC(38:7) +2K-H]+          |
| Brain_NAPA | 881.4691  | 881.4730  | -3.9             | [ PG(42:10) +K]+            |

| Sample     | Meas. m/z | Calc. m/z | $\Delta m$ (mDa) | Tentative identification     |
|------------|-----------|-----------|------------------|------------------------------|
| Brain_NAPA | 884.4695  | 884.4721  | -2.6             | [ Sulfatide(d36:1) +2K-H]+   |
| Brain_NAPA | 885.4677  | 885.4653  | 2.4              | [ PG(42:11) +2Na-H]+         |
| Brain_NAPA | 888.4513  | 888.4554  | -4.1             | [ PS(38:4) +2K-H]+           |
| Brain_NAPA | 890.5924  | 890.5906  | 1.9              | [ PS(44:7) +H]+              |
| Brain_NAPA | 892.4661  | 892.4656  | 0.5              | [ PE(42:8) +2K-H]+           |
| Brain_NAPA | 894.4799  | 894.4812  | -1.3             | [ PE(42:7) +2K-H]+           |
| Brain_NAPA | 901.4778  | 901.4758  | 2.1              | [ PG(40:5) +2K-H]+           |
| Brain_NAPA | 904.6056  | 904.6041  | 1.5              | [ HexCer(d42:1(2OH)) +2K-H]+ |
| Brain_NAPA | 904.6056  | 904.6040  | 1.6              | [ PI-Cer(40:0) +K]+          |
| Brain_NAPA | 906.5692  | 906.5712  | -2.0             | [ Sulfatide(d40:2) +2Na-H]+  |
| Brain_NAPA | 911.4453  | 911.4449  | 0.4              | [ PI(34:2) +2K-H]+           |
| Brain_NAPA | 912.4571  | 912.4554  | 1.7              | [ PS(40:6) +2K-H]+           |
| Brain_NAPA | 916.6075  | 916.6041  | 3.4              | [ HexCer(d43:2(2OH)) +2K-H]+ |
| Brain_NAPA | 923.5045  | 923.5046  | -0.2             | [ PI(38:5) +K]+              |
| Brain_NAPA | 925.5208  | 925.5203  | 0.5              | [ PI(38:4) +K]+              |
| Brain_NAPA | 930.6127  | 930.6101  | 2.6              | [ Sulfatide(d42:1) +K]+      |
| Brain_NAPA | 934.5997  | 934.6025  | -2.8             | [ Sulfatide(d42:2) +2Na-H]+  |
| Brain_NAPA | 935.4418  | 935.4449  | -3.0             | [ PI(36:4) +2K-H]+           |
| Brain_NAPA | 938.5145  | 938.5190  | -4.5             | [ Sulfatide(d40:2) +2K-H]+   |
| Brain_NAPA | 943.4270  | 943.4288  | -1.9             | [ PG(44:12) +2K-H]+          |
| Brain_NAPA | 959.4470  | 959.4449  | 2.2              | [ PI(38:6) +2K-H]+           |
| Brain_NAPA | 960.5284  | 960.5282  | 0.2              | [ PC(44:9) +2K-H]+           |
| Brain_NAPA | 961.4617  | 961.4605  | 1.2              | [ PI(38:5) +2K-H]+           |
| Brain_NAPA | 963.4755  | 963.4762  | -0.6             | [ PI(38:4) +2K-H]+           |
| Brain_NAPA | 964.5310  | 964.5347  | -3.7             | [ Sulfatide(d42:3) +2K-H]+   |
| Brain_NAPA | 966.5485  | 966.5503  | -1.9             | [ Sulfatide(d42:2) +2K-H]+   |
| Brain_NAPA | 987.4742  | 987.4762  | -1.9             | [ PI(40:6) +2K-H]+           |
| Brain_NAPA | 1047.6245 | 1047.6241 | 0.4              | [ TG(62:16) +2K-H]+          |

**Table S2.** Tentative lipid identifications based on mass accuracy tolerance of  $\Delta m/z \leq \pm 5$  mDa from analysis of mouse lung tissue sections by MALDI- and NAPA-LDI-MSI. For  $m/z$  values with multiple potential interpretations, all possibilities are listed.

| Sample     | Meas. $m/z$ | Calc. $m/z$ | $\Delta m$ (mDa) | Tentative identification               |
|------------|-------------|-------------|------------------|----------------------------------------|
| Lung_MALDI | 327.2271    | 327.2271    | 0.0              | [ FA(18:1) +2Na-H]+                    |
| Lung_MALDI | 329.2428    | 329.2427    | 0.1              | [ FA(18:0) +2Na-H]+                    |
| Lung_MALDI | 333.1592    | 333.1593    | 0.0              | [ FA(16:0) +2K-H]+                     |
| Lung_MALDI | 369.3515    | 369.3516    | -0.1             | [ Cholesterol (-H <sub>2</sub> O) +H]+ |
| Lung_MALDI | 479.0949    | 479.0938    | 1.0              | [ FMN +Na]+                            |
| Lung_MALDI | 496.3386    | 496.3398    | -1.2             | [ LysoPC(16:0) +H]+                    |
| Lung_MALDI | 498.2554    | 498.2567    | -1.3             | [ LysoPE(16:0) +2Na-H]+                |
| Lung_MALDI | 518.3202    | 518.3217    | -1.6             | [ LysoPC(16:0) +Na]+                   |
| Lung_MALDI | 524.3697    | 524.3711    | -1.3             | [ LysoPC(18:0) +H]+                    |
| Lung_MALDI | 526.2865    | 526.2880    | -1.6             | [ LysoPE(18:0) +2Na-H]+                |
| Lung_MALDI | 534.2966    | 534.2957    | 1.0              | [ LysoPC(16:0) +K]+                    |
| Lung_MALDI | 546.3517    | 546.3530    | -1.3             | [ LysoPC(18:0) +Na]+                   |
| Lung_MALDI | 554.2668    | 554.2644    | 2.5              | [ LysoPC(18:4) +K]+                    |
| Lung_MALDI | 558.2982    | 558.2957    | 2.6              | [ LysoPC(18:2) +K]+                    |
| Lung_MALDI | 558.4836    | 558.4857    | -2.1             | [ Cer(d34:2) +Na]+                     |
| Lung_MALDI | 560.5007    | 560.5013    | -0.6             | [ Cer(d34:1) +Na]+                     |
| Lung_MALDI | 561.2013    | 561.1992    | 2.1              | [ LysoPG(16:0) +2K-H]+                 |
| Lung_MALDI | 562.3274    | 562.3270    | 0.4              | [ LysoPC(18:0) +K]+                    |
| Lung_MALDI | 568.2817    | 568.2800    | 1.7              | [ LysoPE(22:4) +K]+                    |
| Lung_MALDI | 592.2817    | 592.2800    | 1.7              | [ LysoPE(24:6) +K]+                    |
| Lung_MALDI | 610.3281    | 610.3270    | 1.1              | [ LysoPC(22:4) +K]+                    |
| Lung_MALDI | 615.4958    | 615.4959    | -0.1             | [ DG(34:2) +Na]+                       |
| Lung_MALDI | 617.5117    | 617.5140    | -2.2             | [ DG(36:4) +H]+                        |
| Lung_MALDI | 617.5117    | 617.5116    | 0.2              | [ DG(34:1) +Na]+                       |
| Lung_MALDI | 618.3900    | 618.3896    | 0.5              | [ LysoPC(22:0) +K]+                    |
| Lung_MALDI | 637.4790    | 637.4778    | 1.2              | [ DG(34:2) +2Na-H]+                    |
| Lung_MALDI | 639.4951    | 639.4935    | 1.6              | [ DG(34:1) +2Na-H]+                    |
| Lung_MALDI | 639.4951    | 639.4959    | -0.8             | [ DG(36:4) +Na]+                       |
| Lung_MALDI | 641.5108    | 641.5140    | -3.1             | [ DG(38:6) +H]+                        |
| Lung_MALDI | 641.5108    | 641.5116    | -0.7             | [ DG(36:3) +Na]+                       |
| Lung_MALDI | 643.5266    | 643.5272    | -0.6             | [ DG(36:2) +Na]+                       |
| Lung_MALDI | 643.5266    | 643.5296    | -3.0             | [ DG(38:5) +H]+                        |
| Lung_MALDI | 656.4245    | 656.4262    | -1.6             | [ PE(28:1) +Na]+                       |
| Lung_MALDI | 661.4784    | 661.4778    | 0.6              | [ DG(36:4) +2Na-H]+                    |
| Lung_MALDI | 662.4488    | 662.4496    | -0.8             | [ CerP(d34:1) +2Na-H]+                 |
| Lung_MALDI | 663.4950    | 663.4935    | 1.6              | [ DG(36:3) +2Na-H]+                    |
| Lung_MALDI | 663.4950    | 663.4959    | -0.9             | [ DG(38:6) +Na]+                       |
| Lung_MALDI | 663.4950    | 663.4983    | -3.3             | [ DG(40:9) +H]+                        |
| Lung_MALDI | 665.5093    | 665.5116    | -2.2             | [ DG(38:5) +Na]+                       |
| Lung_MALDI | 665.5093    | 665.5091    | 0.2              | [ DG(36:2) +2Na-H]+                    |
| Lung_MALDI | 666.4819    | 666.4833    | -1.4             | [ CerP(d36:2) +Na]+                    |
| Lung_MALDI | 666.5756    | 666.5772    | -1.6             | [ Cer(d40:1) +2Na-H]+                  |
| Lung_MALDI | 668.5906    | 668.5928    | -2.2             | [ Cer(d40:0) +2Na-H]+                  |

| Sample     | Meas. m/z | Calc. m/z | $\Delta m$ (mDa) | Tentative identification |
|------------|-----------|-----------|------------------|--------------------------|
| Lung_MALDI | 669.4471  | 669.4490  | -1.9             | [ PA(34:4) +H]+          |
| Lung_MALDI | 669.4471  | 669.4466  | 0.5              | [ PA(32:1) +Na]+         |
| Lung_MALDI | 670.6092  | 670.6109  | -1.7             | [ Cer(d42:2) +Na]+       |
| Lung_MALDI | 672.4557  | 672.4575  | -1.8             | [ PC(26:0) +Na]+         |
| Lung_MALDI | 682.4568  | 682.4572  | -0.5             | [ CerP(d36:2) +K]+       |
| Lung_MALDI | 685.4190  | 685.4205  | -1.6             | [ PA(32:1) +K]+          |
| Lung_MALDI | 688.4638  | 688.4652  | -1.4             | [ CerP(d36:2) +2Na-H]+   |
| Lung_MALDI | 689.5095  | 689.5091  | 0.3              | [ DG(38:4) +2Na-H]+      |
| Lung_MALDI | 691.4286  | 691.4309  | -2.3             | [ PA(34:4) +Na]+         |
| Lung_MALDI | 691.4286  | 691.4285  | 0.1              | [ PA(32:1) +2Na-H]+      |
| Lung_MALDI | 693.4441  | 693.4466  | -2.5             | [ PA(34:3) +Na]+         |
| Lung_MALDI | 693.4441  | 693.4442  | 0.0              | [ PA(32:0) +2Na-H]+      |
| Lung_MALDI | 695.4613  | 695.4646  | -3.4             | [ PA(36:5) +H]+          |
| Lung_MALDI | 697.4765  | 697.4779  | -1.4             | [ PA(34:1) +Na]+         |
| Lung_MALDI | 707.4587  | 707.4622  | -3.5             | [ DG(40:9) +2Na-H]+      |
| Lung_MALDI | 709.4184  | 709.4205  | -2.1             | [ PA(34:3) +K]+          |
| Lung_MALDI | 709.5132  | 709.5168  | -3.5             | [ DG(40:5) +K]+          |
| Lung_MALDI | 713.4505  | 713.4518  | -1.3             | [ PA(34:1) +K]+          |
| Lung_MALDI | 717.4431  | 717.4466  | -3.4             | [ PA(36:5) +Na]+         |
| Lung_MALDI | 719.4585  | 719.4598  | -1.3             | [ PA(34:1) +2Na-H]+      |
| Lung_MALDI | 720.4127  | 720.4131  | -0.5             | [ CerP(d36:2) +2K-H]+    |
| Lung_MALDI | 721.3582  | 721.3608  | -2.5             | [ PA(32:2) +2K-H]+       |
| Lung_MALDI | 721.4763  | 721.4755  | 0.8              | [ PA(34:0) +2Na-H]+      |
| Lung_MALDI | 721.4763  | 721.4779  | -1.6             | [ PA(36:3) +Na]+         |
| Lung_MALDI | 723.4923  | 723.4935  | -1.2             | [ PA(36:2) +Na]+         |
| Lung_MALDI | 725.3922  | 725.3921  | 0.1              | [ PA(32:0) +2K-H]+       |
| Lung_MALDI | 725.5552  | 725.5568  | -1.6             | [ SM(d34:1) +Na]+        |
| Lung_MALDI | 726.5094  | 726.5068  | 2.5              | [ PC(32:4) +H]+          |
| Lung_MALDI | 728.5183  | 728.5201  | -1.8             | [ PC(30:0) +Na]+         |
| Lung_MALDI | 729.4821  | 729.4855  | -3.4             | [ DG(42:9) +K]+          |
| Lung_MALDI | 731.4014  | 731.4049  | -3.5             | [ PA(36:6) +K]+          |
| Lung_MALDI | 732.5516  | 732.5538  | -2.2             | [ PC(32:1) +H]+          |
| Lung_MALDI | 733.4176  | 733.4205  | -2.9             | [ PA(36:5) +K]+          |
| Lung_MALDI | 735.4333  | 735.4362  | -2.9             | [ PA(36:4) +K]+          |
| Lung_MALDI | 737.4510  | 737.4518  | -0.8             | [ PA(36:3) +K]+          |
| Lung_MALDI | 739.4661  | 739.4675  | -1.3             | [ PA(36:2) +K]+          |
| Lung_MALDI | 741.4830  | 741.4831  | -0.1             | [ PA(36:1) +K]+          |
| Lung_MALDI | 741.5293  | 741.5307  | -1.5             | [ SM(d34:1) +K]+         |
| Lung_MALDI | 742.5334  | 742.5357  | -2.3             | [ PE(34:0) +Na]+         |
| Lung_MALDI | 743.4594  | 743.4598  | -0.5             | [ PA(36:3) +2Na-H]+      |
| Lung_MALDI | 743.4594  | 743.4622  | -2.9             | [ PA(38:6) +Na]+         |
| Lung_MALDI | 744.4909  | 744.4915  | -0.5             | [ PE 34:2p +2Na-H]+      |
| Lung_MALDI | 744.4909  | 744.4940  | -3.1             | [ PC(30:0) +K]+          |
| Lung_MALDI | 745.4758  | 745.4755  | 0.3              | [ PA(36:2) +2Na-H]+      |
| Lung_MALDI | 745.4758  | 745.4779  | -2.1             | [ PA(38:5) +Na]+         |
| Lung_MALDI | 746.5668  | 746.5694  | -2.7             | [ PE(36:1) +H]+          |
| Lung_MALDI | 747.3748  | 747.3764  | -1.6             | [ PA(34:3) +2K-H]+       |

| Sample     | Meas. m/z | Calc. m/z | $\Delta m$ (mDa) | Tentative identification |
|------------|-----------|-----------|------------------|--------------------------|
| Lung_MALDI | 747.4912  | 747.4911  | 0.1              | [ PA(36:1) +2Na-H]+      |
| Lung_MALDI | 747.4912  | 747.4935  | -2.3             | [ PA(38:4) +Na]+         |
| Lung_MALDI | 747.4912  | 747.4879  | 3.3              | [ CE(20:5) +2K-H]+       |
| Lung_MALDI | 748.5818  | 748.5851  | -3.3             | [ PE(36:0) +H]+          |
| Lung_MALDI | 749.5095  | 749.5116  | -2.1             | [ PA(40:6) +H]+          |
| Lung_MALDI | 749.5095  | 749.5092  | 0.3              | [ PA(38:3) +Na]+         |
| Lung_MALDI | 749.5095  | 749.5068  | 2.7              | [ PA(36:0) +2Na-H]+      |
| Lung_MALDI | 750.5753  | 750.5772  | -1.9             | [ CerP(d42:2) +Na]+      |
| Lung_MALDI | 751.4070  | 751.4077  | -0.7             | [ PA(34:1) +2K-H]+       |
| Lung_MALDI | 751.5240  | 751.5248  | -0.8             | [ PA(38:2) +Na]+         |
| Lung_MALDI | 751.5240  | 751.5272  | -3.2             | [ PA(40:5) +H]+          |
| Lung_MALDI | 753.5864  | 753.5881  | -1.7             | [ SM(d36:1) +Na]+        |
| Lung_MALDI | 754.5339  | 754.5357  | -1.8             | [ PC(32:1) +Na]+         |
| Lung_MALDI | 757.4175  | 757.4205  | -3.0             | [ PA(38:7) +K]+          |
| Lung_MALDI | 758.5076  | 758.5097  | -2.0             | [ PE(34:0) +K]+          |
| Lung_MALDI | 759.4335  | 759.4362  | -2.7             | [ PA(38:6) +K]+          |
| Lung_MALDI | 760.5828  | 760.5851  | -2.3             | [ PC(34:1) +H]+          |
| Lung_MALDI | 761.4494  | 761.4518  | -2.4             | [ PA(38:5) +K]+          |
| Lung_MALDI | 763.4657  | 763.4675  | -1.8             | [ PA(38:4) +K]+          |
| Lung_MALDI | 764.5151  | 764.5177  | -2.5             | [ PE(34:0) +2Na-H]+      |
| Lung_MALDI | 765.4836  | 765.4831  | 0.4              | [ PA(38:3) +K]+          |
| Lung_MALDI | 766.5505  | 766.5511  | -0.7             | [ CerP(d42:2) +K]+       |
| Lung_MALDI | 767.4593  | 767.4598  | -0.5             | [ PA(38:5) +2Na-H]+      |
| Lung_MALDI | 767.4593  | 767.4622  | -2.9             | [ PA(40:8) +Na]+         |
| Lung_MALDI | 767.4986  | 767.4988  | -0.2             | [ PA(38:2) +K]+          |
| Lung_MALDI | 768.4904  | 768.4915  | -1.1             | [ PE 36:4p +2Na-H]+      |
| Lung_MALDI | 768.4904  | 768.4940  | -3.6             | [ PC(32:2) +K]+          |
| Lung_MALDI | 768.5510  | 768.5514  | -0.4             | [ PE(36:1) +Na]+         |
| Lung_MALDI | 768.5510  | 768.5538  | -2.8             | [ PE(38:4) +H]+          |
| Lung_MALDI | 769.4746  | 769.4755  | -0.9             | [ PA(38:4) +2Na-H]+      |
| Lung_MALDI | 769.4746  | 769.4779  | -3.3             | [ PA(40:7) +Na]+         |
| Lung_MALDI | 769.5604  | 769.5620  | -1.6             | [ SM(d36:1) +K]+         |
| Lung_MALDI | 770.5046  | 770.5071  | -2.5             | [ PE 36:3p +2Na-H]+      |
| Lung_MALDI | 770.5645  | 770.5670  | -2.5             | [ PE(36:0) +Na]+         |
| Lung_MALDI | 771.3749  | 771.3764  | -1.5             | [ PA(36:5) +2K-H]+       |
| Lung_MALDI | 772.5232  | 772.5252  | -1.9             | [ PE 38:5p +Na]+         |
| Lung_MALDI | 772.5232  | 772.5228  | 0.5              | [ PE 36:2p +2Na-H]+      |
| Lung_MALDI | 773.3897  | 773.3921  | -2.3             | [ PA(36:4) +2K-H]+       |
| Lung_MALDI | 774.5757  | 774.5748  | 0.9              | [ CerP(d42:1) +2Na-H]+   |
| Lung_MALDI | 775.4074  | 775.4077  | -0.3             | [ PA(36:3) +2K-H]+       |
| Lung_MALDI | 775.5227  | 775.5248  | -2.1             | [ PA(40:4) +Na]+         |
| Lung_MALDI | 775.5227  | 775.5224  | 0.3              | [ PA(38:1) +2Na-H]+      |
| Lung_MALDI | 775.5227  | 775.5192  | 3.5              | [ CE(22:5) +2K-H]+       |
| Lung_MALDI | 777.4222  | 777.4234  | -1.1             | [ PA(36:2) +2K-H]+       |
| Lung_MALDI | 778.4751  | 778.4784  | -3.3             | [ PE(36:4) +K]+          |
| Lung_MALDI | 778.5325  | 778.5357  | -3.2             | [ PC(34:3) +Na]+         |
| Lung_MALDI | 779.4385  | 779.4390  | -0.5             | [ PA(36:1) +2K-H]+       |

| Sample     | Meas. m/z | Calc. m/z | $\Delta m$ (mDa) | Tentative identification     |
|------------|-----------|-----------|------------------|------------------------------|
| Lung_MALDI | 780.4907  | 780.4940  | -3.3             | [ PE(36:3) +K]+              |
| Lung_MALDI | 780.5492  | 780.5514  | -2.2             | [ PC(34:2) +Na]+             |
| Lung_MALDI | 781.6173  | 781.6194  | -2.1             | [ SM(d38:1) +Na]+            |
| Lung_MALDI | 782.5649  | 782.5670  | -2.2             | [ PC(34:1) +Na]+             |
| Lung_MALDI | 783.4344  | 783.4362  | -1.7             | [ PA(40:8) +K]+              |
| Lung_MALDI | 784.5800  | 784.5827  | -2.7             | [ PC(34:0) +Na]+             |
| Lung_MALDI | 785.4481  | 785.4518  | -3.7             | [ PA(40:7) +K]+              |
| Lung_MALDI | 787.4666  | 787.4675  | -0.9             | [ PA(40:6) +K]+              |
| Lung_MALDI | 789.4814  | 789.4831  | -1.8             | [ PA(40:5) +K]+              |
| Lung_MALDI | 792.4820  | 792.4789  | 3.1              | [ HexCer(d34:1(2OH)) +2K-H]+ |
| Lung_MALDI | 793.4777  | 793.4755  | 2.2              | [ PA(40:6) +2Na-H]+          |
| Lung_MALDI | 793.4777  | 793.4803  | -2.6             | [ PA(44:12) +H]+             |
| Lung_MALDI | 794.4499  | 794.4460  | 3.9              | [ Sulfatide(d32:2) +2Na-H]+  |
| Lung_MALDI | 794.4499  | 794.4499  | 0.0              | [ PE(34:1) +2K-H]+           |
| Lung_MALDI | 795.4878  | 795.4911  | -3.4             | [ PA(40:5) +2Na-H]+          |
| Lung_MALDI | 796.4659  | 796.4656  | 0.3              | [ PE(34:0) +2K-H]+           |
| Lung_MALDI | 796.5221  | 796.5228  | -0.6             | [ PE 38:4p +2Na-H]+          |
| Lung_MALDI | 796.5221  | 796.5253  | -3.2             | [ PC(34:2) +K]+              |
| Lung_MALDI | 796.5798  | 796.5827  | -2.9             | [ PE(38:1) +Na]+             |
| Lung_MALDI | 797.3945  | 797.3921  | 2.4              | [ PA(38:6) +2K-H]+           |
| Lung_MALDI | 797.5903  | 797.5933  | -3.0             | [ SM(d38:1) +K]+             |
| Lung_MALDI | 798.5384  | 798.5410  | -2.5             | [ PC(34:1) +K]+              |
| Lung_MALDI | 798.5384  | 798.5408  | -2.4             | [ PE 40:6p +Na]+             |
| Lung_MALDI | 798.5384  | 798.5384  | 0.0              | [ PE 38:3p +2Na-H]+          |
| Lung_MALDI | 799.4075  | 799.4077  | -0.2             | [ PA(38:5) +2K-H]+           |
| Lung_MALDI | 801.4200  | 801.4234  | -3.3             | [ PA(38:4) +2K-H]+           |
| Lung_MALDI | 801.5408  | 801.5381  | 2.7              | [ PA(40:2) +2Na-H]+          |
| Lung_MALDI | 804.5490  | 804.5490  | 0.1              | [ PC(34:1) +2Na-H]+          |
| Lung_MALDI | 804.5490  | 804.5514  | -2.3             | [ PC(36:4) +Na]+             |
| Lung_MALDI | 806.5067  | 806.5097  | -2.9             | [ PE(38:4) +K]+              |
| Lung_MALDI | 806.5653  | 806.5646  | 0.6              | [ PC(34:0) +2Na-H]+          |
| Lung_MALDI | 806.5653  | 806.5670  | -1.8             | [ PC(36:3) +Na]+             |
| Lung_MALDI | 807.6322  | 807.6351  | -2.8             | [ SM(d40:2) +Na]+            |
| Lung_MALDI | 808.5808  | 808.5827  | -1.9             | [ PC(36:2) +Na]+             |
| Lung_MALDI | 809.6489  | 809.6507  | -1.8             | [ SM(d40:1) +Na]+            |
| Lung_MALDI | 810.5975  | 810.6007  | -3.3             | [ PC(38:4) +H]+              |
| Lung_MALDI | 810.5975  | 810.5983  | -0.9             | [ PC(36:1) +Na]+             |
| Lung_MALDI | 812.5159  | 812.5177  | -1.8             | [ PE(38:4) +2Na-H]+          |
| Lung_MALDI | 815.4611  | 815.4622  | -1.1             | [ PA(44:12) +Na]+            |
| Lung_MALDI | 816.5450  | 816.5490  | -4.0             | [ PE(38:2) +2Na-H]+          |
| Lung_MALDI | 818.5608  | 818.5646  | -3.8             | [ PE(38:1) +2Na-H]+          |
| Lung_MALDI | 820.4636  | 820.4656  | -1.9             | [ PE(36:2) +2K-H]+           |
| Lung_MALDI | 820.5229  | 820.5228  | 0.1              | [ PE 40:6p +2Na-H]+          |
| Lung_MALDI | 820.5229  | 820.5253  | -2.5             | [ PC(36:4) +K]+              |
| Lung_MALDI | 822.4790  | 822.4773  | 1.7              | [ Sulfatide(d34:2) +2Na-H]+  |
| Lung_MALDI | 822.4790  | 822.4812  | -2.2             | [ PE(36:1) +2K-H]+           |
| Lung_MALDI | 822.5377  | 822.5408  | -3.2             | [ PE 42:8p +Na]+             |



| Sample     | Meas. m/z | Calc. m/z | $\Delta m$ (mDa) | Tentative identification |
|------------|-----------|-----------|------------------|--------------------------|
| Lung_MALDI | 822.5377  | 822.5384  | -0.8             | [ PE 40:5p +2Na-H]+      |
| Lung_MALDI | 822.5377  | 822.5410  | -3.3             | [ PC(36:3) +K]+          |
| Lung_MALDI | 824.5543  | 824.5541  | 0.3              | [ PE 40:4p +2Na-H]+      |
| Lung_MALDI | 824.5543  | 824.5566  | -2.3             | [ PC(36:2) +K]+          |
| Lung_MALDI | 824.5543  | 824.5565  | -2.1             | [ PE 42:7p +Na]+         |
| Lung_MALDI | 824.6116  | 824.6140  | -2.3             | [ PE(40:1) +Na]+         |
| Lung_MALDI | 825.6215  | 825.6246  | -3.1             | [ SM(d40:1) +K]+         |
| Lung_MALDI | 826.4586  | 826.4550  | 3.6              | [ PE 38:5p +2K-H]+       |
| Lung_MALDI | 826.5707  | 826.5697  | 1.0              | [ PE 40:3p +2Na-H]+      |
| Lung_MALDI | 826.5707  | 826.5723  | -1.6             | [ PC(36:1) +K]+          |
| Lung_MALDI | 826.5707  | 826.5721  | -1.4             | [ PE 42:6p +Na]+         |
| Lung_MALDI | 827.4368  | 827.4390  | -2.2             | [ PA(40:5) +2K-H]+       |
| Lung_MALDI | 827.7080  | 827.7099  | -1.9             | [ TG(48:1) +Na]+         |
| Lung_MALDI | 828.4903  | 828.4940  | -3.7             | [ PE(40:7) +K]+          |
| Lung_MALDI | 828.5496  | 828.5490  | 0.7              | [ PC(36:3) +2Na-H]+      |
| Lung_MALDI | 828.5496  | 828.5514  | -1.7             | [ PC(38:6) +Na]+         |
| Lung_MALDI | 829.7236  | 829.7256  | -1.9             | [ TG(48:0) +Na]+         |
| Lung_MALDI | 830.5647  | 830.5646  | 0.1              | [ PC(36:2) +2Na-H]+      |
| Lung_MALDI | 830.5647  | 830.5670  | -2.3             | [ PC(38:5) +Na]+         |
| Lung_MALDI | 832.5813  | 832.5827  | -1.4             | [ PC(38:4) +Na]+         |
| Lung_MALDI | 832.5813  | 832.5803  | 1.0              | [ PC(36:1) +2Na-H]+      |
| Lung_MALDI | 832.5813  | 832.5851  | -3.8             | [ PC(40:7) +H]+          |
| Lung_MALDI | 833.6478  | 833.6483  | -0.5             | [ SM(d40:0) +2Na-H]+     |
| Lung_MALDI | 834.5192  | 834.5232  | -3.9             | [ PS(36:1) +2Na-H]+      |
| Lung_MALDI | 835.6642  | 835.6664  | -2.1             | [ SM(d42:2) +Na]+        |
| Lung_MALDI | 836.5176  | 836.5177  | -0.1             | [ PE(40:6) +2Na-H]+      |
| Lung_MALDI | 836.6105  | 836.6140  | -3.5             | [ PC(38:2) +Na]+         |
| Lung_MALDI | 837.6802  | 837.6820  | -1.8             | [ SM(d42:1) +Na]+        |
| Lung_MALDI | 838.5295  | 838.5333  | -3.8             | [ PE(40:5) +2Na-H]+      |
| Lung_MALDI | 840.4329  | 840.4343  | -1.4             | [ PE(38:6) +2K-H]+       |
| Lung_MALDI | 840.5461  | 840.5490  | -2.9             | [ PE(40:4) +2Na-H]+      |
| Lung_MALDI | 842.4482  | 842.4499  | -1.7             | [ PE(38:5) +2K-H]+       |
| Lung_MALDI | 844.4640  | 844.4656  | -1.5             | [ PE(38:4) +2K-H]+       |
| Lung_MALDI | 844.5230  | 844.5253  | -2.3             | [ PC(38:6) +K]+          |
| Lung_MALDI | 844.5230  | 844.5228  | 0.3              | [ PE 42:8p +2Na-H]+      |
| Lung_MALDI | 845.6980  | 845.6995  | -1.5             | [ TG(48:0) +K]+          |
| Lung_MALDI | 846.5374  | 846.5384  | -1.0             | [ PE 42:7p +2Na-H]+      |
| Lung_MALDI | 846.5374  | 846.5410  | -3.6             | [ PC(38:5) +K]+          |
| Lung_MALDI | 848.5544  | 848.5566  | -2.2             | [ PC(38:4) +K]+          |
| Lung_MALDI | 848.5544  | 848.5541  | 0.4              | [ PE 42:6p +2Na-H]+      |
| Lung_MALDI | 849.4406  | 849.4445  | -3.8             | [ PG(36:3) +2K-H]+       |
| Lung_MALDI | 851.6385  | 851.6403  | -1.8             | [ SM(d42:2) +K]+         |
| Lung_MALDI | 851.7091  | 851.7075  | 1.6              | [ TG(48:0) +2Na-H]+      |
| Lung_MALDI | 851.7091  | 851.7123  | -3.2             | [ TG(52:6) +H]+          |
| Lung_MALDI | 851.7091  | 851.7099  | -0.8             | [ TG(50:3) +Na]+         |
| Lung_MALDI | 852.5461  | 852.5490  | -2.9             | [ PC(38:5) +2Na-H]+      |
| Lung_MALDI | 853.6541  | 853.6559  | -1.9             | [ SM(d42:1) +K]+         |

| Sample     | Meas. m/z | Calc. m/z | $\Delta m$ (mDa) | Tentative identification     |
|------------|-----------|-----------|------------------|------------------------------|
| Lung_MALDI | 853.7240  | 853.7280  | -4.0             | [ TG(52:5) +H]+              |
| Lung_MALDI | 853.7240  | 853.7256  | -1.6             | [ TG(50:2) +Na]+             |
| Lung_MALDI | 854.5661  | 854.5670  | -0.9             | [ PC(40:7) +Na]+             |
| Lung_MALDI | 854.5661  | 854.5694  | -3.3             | [ PC(42:10) +H]+             |
| Lung_MALDI | 854.5661  | 854.5646  | 1.5              | [ PC(38:4) +2Na-H]+          |
| Lung_MALDI | 855.7388  | 855.7412  | -2.4             | [ TG(50:1) +Na]+             |
| Lung_MALDI | 856.5242  | 856.5253  | -1.1             | [ PE(42:7) +K]+              |
| Lung_MALDI | 856.5811  | 856.5827  | -1.6             | [ PC(40:6) +Na]+             |
| Lung_MALDI | 856.5811  | 856.5803  | 0.8              | [ PC(38:3) +2Na-H]+          |
| Lung_MALDI | 858.4565  | 858.4564  | 0.1              | [ Sulfatide(d34:0) +2K-H]+   |
| Lung_MALDI | 860.6114  | 860.6116  | -0.2             | [ PC(38:1) +2Na-H]+          |
| Lung_MALDI | 860.6114  | 860.6140  | -2.6             | [ PC(40:4) +Na]+             |
| Lung_MALDI | 866.4677  | 866.4710  | -3.3             | [ PS(36:1) +2K-H]+           |
| Lung_MALDI | 868.4642  | 868.4656  | -1.3             | [ PE(40:6) +2K-H]+           |
| Lung_MALDI | 868.5231  | 868.5253  | -2.2             | [ PC(40:8) +K]+              |
| Lung_MALDI | 869.6976  | 869.6995  | -1.9             | [ TG(50:2) +K]+              |
| Lung_MALDI | 871.4256  | 871.4288  | -3.2             | [ PG(38:6) +2K-H]+           |
| Lung_MALDI | 871.7145  | 871.7152  | -0.6             | [ TG(50:1) +K]+              |
| Lung_MALDI | 872.5546  | 872.5566  | -2.0             | [ PC(40:6) +K]+              |
| Lung_MALDI | 875.7100  | 875.7123  | -2.3             | [ TG(54:8) +H]+              |
| Lung_MALDI | 875.7100  | 875.7099  | 0.1              | [ TG(52:5) +Na]+             |
| Lung_MALDI | 875.7100  | 875.7075  | 2.5              | [ TG(50:2) +2Na-H]+          |
| Lung_MALDI | 877.7241  | 877.7232  | 0.9              | [ TG(50:1) +2Na-H]+          |
| Lung_MALDI | 877.7241  | 877.7280  | -3.9             | [ TG(54:7) +H]+              |
| Lung_MALDI | 877.7241  | 877.7256  | -1.5             | [ TG(52:4) +Na]+             |
| Lung_MALDI | 879.7388  | 879.7388  | 0.0              | [ TG(50:0) +2Na-H]+          |
| Lung_MALDI | 879.7388  | 879.7412  | -2.4             | [ TG(52:3) +Na]+             |
| Lung_MALDI | 880.4857  | 880.4864  | -0.6             | [ PE(44:12) +2Na-H]+         |
| Lung_MALDI | 881.7538  | 881.7569  | -3.0             | [ TG(52:2) +Na]+             |
| Lung_MALDI | 882.4792  | 882.4812  | -2.0             | [ PC(38:6) +2K-H]+           |
| Lung_MALDI | 885.4664  | 885.4653  | 1.1              | [ PG(42:11) +2Na-H]+         |
| Lung_MALDI | 887.4472  | 887.4449  | 2.3              | [ PI(32:0) +2K-H]+           |
| Lung_MALDI | 888.4586  | 888.4554  | 3.2              | [ PS(38:4) +2K-H]+           |
| Lung_MALDI | 891.7033  | 891.7048  | -1.5             | [ 22:1-Glc-cholesterol +Na]+ |
| Lung_MALDI | 893.4107  | 893.4132  | -2.5             | [ PG(40:9) +2K-H]+           |
| Lung_MALDI | 895.7137  | 895.7152  | -1.4             | [ TG(52:3) +K]+              |
| Lung_MALDI | 897.7282  | 897.7308  | -2.6             | [ TG(52:2) +K]+              |
| Lung_MALDI | 901.7242  | 901.7232  | 1.0              | [ TG(52:3) +2Na-H]+          |
| Lung_MALDI | 901.7242  | 901.7280  | -3.8             | [ TG(56:9) +H]+              |
| Lung_MALDI | 901.7242  | 901.7256  | -1.4             | [ TG(54:6) +Na]+             |
| Lung_MALDI | 903.7402  | 903.7388  | 1.4              | [ TG(52:2) +2Na-H]+          |
| Lung_MALDI | 903.7402  | 903.7412  | -1.0             | [ TG(54:5) +Na]+             |
| Lung_MALDI | 903.7402  | 903.7436  | -3.4             | [ TG(56:8) +H]+              |
| Lung_MALDI | 905.7554  | 905.7593  | -3.9             | [ TG(56:7) +H]+              |
| Lung_MALDI | 905.7554  | 905.7545  | 0.9              | [ TG(52:1) +2Na-H]+          |
| Lung_MALDI | 905.7554  | 905.7569  | -1.5             | [ TG(54:4) +Na]+             |
| Lung_MALDI | 907.7696  | 907.7725  | -2.9             | [ TG(54:3) +Na]+             |

| Sample     | Meas. m/z | Calc. m/z | $\Delta m$ (mDa) | Tentative identification               |
|------------|-----------|-----------|------------------|----------------------------------------|
| Lung_MALDI | 908.4965  | 908.4969  | -0.3             | [ PC(40:7) +2K-H]+                     |
| Lung_MALDI | 913.4647  | 913.4605  | 4.2              | [ PI(34:1) +2K-H]+                     |
| Lung_MALDI | 914.5282  | 914.5285  | -0.3             | [ PI-Cer(38:0) +2K-H]+                 |
| Lung_MALDI | 921.7301  | 921.7308  | -0.7             | [ TG(54:4) +K]+                        |
| Lung_MALDI | 931.5269  | 931.5283  | -1.4             | [ PI(38:4) +2Na-H]+                    |
| Lung_MALDI | 935.4447  | 935.4449  | -0.1             | [ PI(36:4) +2K-H]+                     |
| Lung_MALDI | 963.4744  | 963.4762  | -1.7             | [ PI(38:4) +2K-H]+                     |
| Lung_MALDI | 967.5060  | 967.5075  | -1.5             | [ PI(38:2) +2K-H]+                     |
| Lung_MALDI | 994.5865  | 994.5816  | 4.8              | [ Sulfatide(d44:2) +2K-H]+             |
| Lung_NAPA  | 327.2271  | 327.2271  | 0.0              | [ FA(18:1) +2Na-H]+                    |
| Lung_NAPA  | 329.2429  | 329.2427  | 0.2              | [ FA(18:0) +2Na-H]+                    |
| Lung_NAPA  | 369.3519  | 369.3516  | 0.3              | [ Cholesterol (-H <sub>2</sub> O) +H]+ |
| Lung_NAPA  | 457.1105  | 457.1119  | -1.4             | [ FMN +H]+                             |
| Lung_NAPA  | 479.0940  | 479.0938  | 0.2              | [ FMN +Na]+                            |
| Lung_NAPA  | 500.2558  | 500.2539  | 1.9              | [ Carnitine(18:2) +2K-H]+              |
| Lung_NAPA  | 501.0781  | 501.0758  | 2.3              | [ FMN +2Na-H]+                         |
| Lung_NAPA  | 516.2512  | 516.2487  | 2.5              | [ LysoPE(18:2) +K]+                    |
| Lung_NAPA  | 518.2669  | 518.2644  | 2.6              | [ LysoPE(18:1) +K]+                    |
| Lung_NAPA  | 526.2357  | 526.2332  | 2.5              | [ Glycochenodeoxycholic acid +2K-H]+   |
| Lung_NAPA  | 544.2821  | 544.2800  | 2.1              | [ LysoPE(20:2) +K]+                    |
| Lung_NAPA  | 554.2663  | 554.2644  | 2.0              | [ LysoPC(18:4) +K]+                    |
| Lung_NAPA  | 558.2976  | 558.2957  | 2.0              | [ LysoPC(18:2) +K]+                    |
| Lung_NAPA  | 558.3503  | 558.3530  | -2.7             | [ LysoPE(22:1) +Na]+                   |
| Lung_NAPA  | 562.3296  | 562.3270  | 2.6              | [ LysoPC(18:0) +K]+                    |
| Lung_NAPA  | 564.2510  | 564.2487  | 2.3              | [ LysoPE(22:6) +K]+                    |
| Lung_NAPA  | 568.2806  | 568.2800  | 0.5              | [ LysoPE(22:4) +K]+                    |
| Lung_NAPA  | 592.2816  | 592.2800  | 1.6              | [ LysoPE(24:6) +K]+                    |
| Lung_NAPA  | 602.3604  | 602.3583  | 2.1              | [ LysoPE(24:1) +K]+                    |
| Lung_NAPA  | 608.3132  | 608.3113  | 1.9              | [ LysoPC(22:5) +K]+                    |
| Lung_NAPA  | 610.3273  | 610.3270  | 0.4              | [ LysoPC(22:4) +K]+                    |
| Lung_NAPA  | 615.4950  | 615.4959  | -0.9             | [ DG(34:2) +Na]+                       |
| Lung_NAPA  | 617.5109  | 617.5140  | -3.0             | [ DG(36:4) +H]+                        |
| Lung_NAPA  | 617.5109  | 617.5116  | -0.6             | [ DG(34:1) +Na]+                       |
| Lung_NAPA  | 631.4695  | 631.4698  | -0.3             | [ DG(34:2) +K]+                        |
| Lung_NAPA  | 633.4856  | 633.4855  | 0.1              | [ DG(34:1) +K]+                        |
| Lung_NAPA  | 637.4795  | 637.4778  | 1.7              | [ DG(34:2) +2Na-H]+                    |
| Lung_NAPA  | 639.4950  | 639.4959  | -0.9             | [ DG(36:4) +Na]+                       |
| Lung_NAPA  | 639.4950  | 639.4935  | 1.5              | [ DG(34:1) +2Na-H]+                    |
| Lung_NAPA  | 641.5106  | 641.5116  | -1.0             | [ DG(36:3) +Na]+                       |
| Lung_NAPA  | 643.5263  | 643.5272  | -0.9             | [ DG(36:2) +Na]+                       |
| Lung_NAPA  | 657.4862  | 657.4855  | 0.7              | [ DG(36:3) +K]+                        |
| Lung_NAPA  | 659.5016  | 659.5011  | 0.5              | [ DG(36:2) +K]+                        |
| Lung_NAPA  | 666.4817  | 666.4833  | -1.6             | [ CerP(d36:2) +Na]+                    |
| Lung_NAPA  | 667.5251  | 667.5272  | -2.1             | [ DG(38:4) +Na]+                       |
| Lung_NAPA  | 667.5251  | 667.5248  | 0.3              | [ DG(36:1) +2Na-H]+                    |
| Lung_NAPA  | 669.4459  | 669.4466  | -0.7             | [ PA(32:1) +Na]+                       |
| Lung_NAPA  | 669.4459  | 669.4490  | -3.1             | [ PA(34:4) +H]+                        |

| Sample    | Meas. m/z | Calc. m/z | $\Delta m$ (mDa) | Tentative identification |
|-----------|-----------|-----------|------------------|--------------------------|
| Lung_NAPA | 670.6103  | 670.6109  | -0.6             | [ Cer(d42:2) +Na]+       |
| Lung_NAPA | 681.4848  | 681.4855  | -0.7             | [ DG(38:5) +K]+          |
| Lung_NAPA | 682.4564  | 682.4572  | -0.9             | [ CerP(d36:2) +K]+       |
| Lung_NAPA | 688.4626  | 688.4652  | -2.6             | [ CerP(d36:2) +2Na-H]+   |
| Lung_NAPA | 691.4275  | 691.4285  | -1.0             | [ PA(32:1) +2Na-H]+      |
| Lung_NAPA | 691.4275  | 691.4309  | -3.4             | [ PA(34:4) +Na]+         |
| Lung_NAPA | 693.4424  | 693.4442  | -1.8             | [ PA(32:0) +2Na-H]+      |
| Lung_NAPA | 697.4766  | 697.4779  | -1.3             | [ PA(34:1) +Na]+         |
| Lung_NAPA | 710.3550  | 710.3560  | -1.0             | [ PE(28:1) +2K-H]+       |
| Lung_NAPA | 713.4506  | 713.4518  | -1.2             | [ PA(34:1) +K]+          |
| Lung_NAPA | 719.4581  | 719.4598  | -1.7             | [ PA(34:1) +2Na-H]+      |
| Lung_NAPA | 721.4768  | 721.4779  | -1.0             | [ PA(36:3) +Na]+         |
| Lung_NAPA | 721.4768  | 721.4803  | -3.4             | [ PA(38:6) +H]+          |
| Lung_NAPA | 721.4768  | 721.4755  | 1.4              | [ PA(34:0) +2Na-H]+      |
| Lung_NAPA | 722.5522  | 722.5541  | -2.0             | [ HexCer(d34:1) +Na]+    |
| Lung_NAPA | 723.4923  | 723.4935  | -1.2             | [ PA(36:2) +Na]+         |
| Lung_NAPA | 723.4923  | 723.4959  | -3.6             | [ PA(38:5) +H]+          |
| Lung_NAPA | 725.5549  | 725.5568  | -1.9             | [ SM(d34:1) +Na]+        |
| Lung_NAPA | 728.5177  | 728.5201  | -2.4             | [ PC(30:0) +Na]+         |
| Lung_NAPA | 731.4053  | 731.4049  | 0.5              | [ PA(36:6) +K]+          |
| Lung_NAPA | 733.4169  | 733.4205  | -3.6             | [ PA(36:5) +K]+          |
| Lung_NAPA | 736.4834  | 736.4864  | -3.0             | [ PE(32:0) +2Na-H]+      |
| Lung_NAPA | 737.4519  | 737.4518  | 0.1              | [ PA(36:3) +K]+          |
| Lung_NAPA | 739.4105  | 739.4101  | 0.4              | [ DG(40:9) +2K-H]+       |
| Lung_NAPA | 739.4660  | 739.4675  | -1.5             | [ PA(36:2) +K]+          |
| Lung_NAPA | 740.4046  | 740.4030  | 1.6              | [ PE(30:0) +2K-H]+       |
| Lung_NAPA | 741.4422  | 741.4442  | -1.9             | [ PA(36:4) +2Na-H]+      |
| Lung_NAPA | 741.5990  | 741.6004  | -1.3             | [ TG(42:2) +Na]+         |
| Lung_NAPA | 742.5336  | 742.5357  | -2.1             | [ PE(34:0) +Na]+         |
| Lung_NAPA | 743.4600  | 743.4598  | 0.2              | [ PA(36:3) +2Na-H]+      |
| Lung_NAPA | 743.4600  | 743.4622  | -2.2             | [ PA(38:6) +Na]+         |
| Lung_NAPA | 745.4745  | 745.4779  | -3.4             | [ PA(38:5) +Na]+         |
| Lung_NAPA | 745.4745  | 745.4755  | -1.0             | [ PA(36:2) +2Na-H]+      |
| Lung_NAPA | 747.4899  | 747.4911  | -1.2             | [ PA(36:1) +2Na-H]+      |
| Lung_NAPA | 747.4899  | 747.4935  | -3.6             | [ PA(38:4) +Na]+         |
| Lung_NAPA | 747.4899  | 747.4879  | 2.0              | [ CE(20:5) +2K-H]+       |
| Lung_NAPA | 748.5824  | 748.5851  | -2.7             | [ PE(36:0) +H]+          |
| Lung_NAPA | 751.4063  | 751.4077  | -1.4             | [ PA(34:1) +2K-H]+       |
| Lung_NAPA | 753.5855  | 753.5881  | -2.6             | [ SM(d36:1) +Na]+        |
| Lung_NAPA | 754.5334  | 754.5357  | -2.4             | [ PC(32:1) +Na]+         |
| Lung_NAPA | 756.4927  | 756.4940  | -1.4             | [ PE(34:1) +K]+          |
| Lung_NAPA | 757.4182  | 757.4205  | -2.3             | [ PA(38:7) +K]+          |
| Lung_NAPA | 758.5081  | 758.5097  | -1.6             | [ PE(34:0) +K]+          |
| Lung_NAPA | 759.4337  | 759.4362  | -2.4             | [ PA(38:6) +K]+          |
| Lung_NAPA | 763.4652  | 763.4675  | -2.2             | [ PA(38:4) +K]+          |
| Lung_NAPA | 764.5160  | 764.5177  | -1.7             | [ PE(34:0) +2Na-H]+      |
| Lung_NAPA | 766.4182  | 766.4186  | -0.4             | [ PE(32:1) +2K-H]+       |

| Sample    | Meas. m/z | Calc. m/z | $\Delta m$ (mDa) | Tentative identification    |
|-----------|-----------|-----------|------------------|-----------------------------|
| Lung_NAPA | 766.4182  | 766.4147  | 3.6              | [ Sulfatide(d30:2) +2Na-H]+ |
| Lung_NAPA | 767.4573  | 767.4598  | -2.5             | [ PA(38:5) +2Na-H]+         |
| Lung_NAPA | 768.4883  | 768.4915  | -3.2             | [ PE 36:4p +2Na-H]+         |
| Lung_NAPA | 769.4729  | 769.4755  | -2.6             | [ PA(38:4) +2Na-H]+         |
| Lung_NAPA | 771.4946  | 771.4911  | 3.4              | [ PA(38:3) +2Na-H]+         |
| Lung_NAPA | 771.4946  | 771.4935  | 1.0              | [ PA(40:6) +Na]+            |
| Lung_NAPA | 772.5229  | 772.5252  | -2.3             | [ PE 38:5p +Na]+            |
| Lung_NAPA | 772.5229  | 772.5228  | 0.1              | [ PE 36:2p +2Na-H]+         |
| Lung_NAPA | 775.4042  | 775.4077  | -3.5             | [ PA(36:3) +2K-H]+          |
| Lung_NAPA | 777.4233  | 777.4234  | -0.1             | [ PA(36:2) +2K-H]+          |
| Lung_NAPA | 778.4217  | 778.4186  | 3.1              | [ PC(30:2) +2K-H]+          |
| Lung_NAPA | 778.4752  | 778.4784  | -3.2             | [ PE(36:4) +K]+             |
| Lung_NAPA | 780.4902  | 780.4940  | -3.8             | [ PE(36:3) +K]+             |
| Lung_NAPA | 780.5481  | 780.5514  | -3.3             | [ PC(34:2) +Na]+            |
| Lung_NAPA | 782.5649  | 782.5670  | -2.2             | [ PC(34:1) +Na]+            |
| Lung_NAPA | 784.5219  | 784.5253  | -3.4             | [ PE(36:1) +K]+             |
| Lung_NAPA | 786.3897  | 786.3873  | 2.4              | [ PE(34:5) +2K-H]+          |
| Lung_NAPA | 790.4205  | 790.4186  | 1.9              | [ PE(34:3) +2K-H]+          |
| Lung_NAPA | 790.5311  | 790.5333  | -2.3             | [ PE(36:1) +2Na-H]+         |
| Lung_NAPA | 791.4635  | 791.4598  | 3.7              | [ PA(40:7) +2Na-H]+         |
| Lung_NAPA | 792.4320  | 792.4343  | -2.2             | [ PE(34:2) +2K-H]+          |
| Lung_NAPA | 794.4491  | 794.4460  | 3.1              | [ Sulfatide(d32:2) +2Na-H]+ |
| Lung_NAPA | 794.4491  | 794.4499  | -0.8             | [ PE(34:1) +2K-H]+          |
| Lung_NAPA | 794.5032  | 794.5071  | -3.9             | [ PE 38:5p +2Na-H]+         |
| Lung_NAPA | 794.6091  | 794.6117  | -2.5             | [ HexCer(d38:1(2OH)) +Na]+  |
| Lung_NAPA | 796.4646  | 796.4656  | -1.0             | [ PE(34:0) +2K-H]+          |
| Lung_NAPA | 796.4646  | 796.4616  | 3.0              | [ Sulfatide(d32:1) +2Na-H]+ |
| Lung_NAPA | 796.5206  | 796.5228  | -2.1             | [ PE 38:4p +2Na-H]+         |
| Lung_NAPA | 798.5389  | 798.5410  | -2.1             | [ PC(34:1) +K]+             |
| Lung_NAPA | 798.5389  | 798.5408  | -2.0             | [ PE 40:6p +Na]+            |
| Lung_NAPA | 798.5389  | 798.5384  | 0.4              | [ PE 38:3p +2Na-H]+         |
| Lung_NAPA | 799.6755  | 799.6786  | -3.2             | [ TG(46:1) +Na]+            |
| Lung_NAPA | 801.4211  | 801.4234  | -2.3             | [ PA(38:4) +2K-H]+          |
| Lung_NAPA | 801.6925  | 801.6943  | -1.8             | [ TG(46:0) +Na]+            |
| Lung_NAPA | 804.4903  | 804.4940  | -3.7             | [ PE(38:5) +K]+             |
| Lung_NAPA | 804.5483  | 804.5490  | -0.7             | [ PC(34:1) +2Na-H]+         |
| Lung_NAPA | 804.5483  | 804.5514  | -3.1             | [ PC(36:4) +Na]+            |
| Lung_NAPA | 804.6324  | 804.6324  | 0.0              | [ HexCer(d18:2/22:0) +Na]+  |
| Lung_NAPA | 806.5069  | 806.5097  | -2.8             | [ PE(38:4) +K]+             |
| Lung_NAPA | 806.6459  | 806.6480  | -2.1             | [ HexCer(d18:1/22:0) +Na]+  |
| Lung_NAPA | 808.5808  | 808.5827  | -1.8             | [ PC(36:2) +Na]+            |
| Lung_NAPA | 809.6485  | 809.6507  | -2.2             | [ SM(d40:1) +Na]+           |
| Lung_NAPA | 810.5889  | 810.5856  | 3.3              | [ HexCer(d38:1(2OH)) +K]+   |
| Lung_NAPA | 813.6007  | 813.5980  | 2.7              | [ TG(46:5) +2Na-H]+         |
| Lung_NAPA | 815.4651  | 815.4622  | 2.8              | [ PA(44:12) +Na]+           |
| Lung_NAPA | 815.6533  | 815.6526  | 0.8              | [ TG(46:1) +K]+             |
| Lung_NAPA | 816.4318  | 816.4343  | -2.5             | [ PE(36:4) +2K-H]+          |

| Sample    | Meas. m/z | Calc. m/z | $\Delta m$ (mDa) | Tentative identification    |
|-----------|-----------|-----------|------------------|-----------------------------|
| Lung_NAPA | 817.6667  | 817.6682  | -1.5             | [ TG(46:0) +K]+             |
| Lung_NAPA | 818.5640  | 818.5646  | -0.6             | [ PE(38:1) +2Na-H]+         |
| Lung_NAPA | 818.5640  | 818.5670  | -3.0             | [ PE(40:4) +Na]+            |
| Lung_NAPA | 820.4635  | 820.4656  | -2.0             | [ PE(36:2) +2K-H]+          |
| Lung_NAPA | 820.5207  | 820.5228  | -2.0             | [ PE 40:6p +2Na-H]+         |
| Lung_NAPA | 822.4802  | 822.4812  | -1.0             | [ PE(36:1) +2K-H]+          |
| Lung_NAPA | 822.4802  | 822.4773  | 2.9              | [ Sulfatide(d34:2) +2Na-H]+ |
| Lung_NAPA | 822.5359  | 822.5384  | -2.5             | [ PE 40:5p +2Na-H]+         |
| Lung_NAPA | 822.6411  | 822.6430  | -1.9             | [ HexCer(t40:1) +Na]+       |
| Lung_NAPA | 824.5530  | 824.5565  | -3.5             | [ PE 42:7p +Na]+            |
| Lung_NAPA | 824.5530  | 824.5541  | -1.0             | [ PE 40:4p +2Na-H]+         |
| Lung_NAPA | 824.5530  | 824.5566  | -3.6             | [ PC(36:2) +K]+             |
| Lung_NAPA | 825.6924  | 825.6943  | -1.9             | [ TG(48:2) +Na]+            |
| Lung_NAPA | 827.4359  | 827.4390  | -3.1             | [ PA(40:5) +2K-H]+          |
| Lung_NAPA | 827.7082  | 827.7099  | -1.8             | [ TG(48:1) +Na]+            |
| Lung_NAPA | 828.4910  | 828.4940  | -3.0             | [ PE(40:7) +K]+             |
| Lung_NAPA | 829.7237  | 829.7256  | -1.8             | [ TG(48:0) +Na]+            |
| Lung_NAPA | 830.6460  | 830.6456  | 0.4              | [ HexCer(d40:0) +2Na-H]+    |
| Lung_NAPA | 832.5214  | 832.5253  | -3.9             | [ PE(40:5) +K]+             |
| Lung_NAPA | 832.5802  | 832.5827  | -2.5             | [ PC(38:4) +Na]+            |
| Lung_NAPA | 832.5802  | 832.5803  | -0.1             | [ PC(36:1) +2Na-H]+         |
| Lung_NAPA | 832.6614  | 832.6637  | -2.2             | [ HexCer(d42:2) +Na]+       |
| Lung_NAPA | 834.5379  | 834.5410  | -3.1             | [ PE(40:4) +K]+             |
| Lung_NAPA | 834.6764  | 834.6793  | -3.0             | [ HexCer(d42:1) +Na]+       |
| Lung_NAPA | 838.5108  | 838.5125  | -1.7             | [ PC(34:0) +2K-H]+          |
| Lung_NAPA | 838.5108  | 838.5148  | -4.0             | [ PE 42:8p +K]+             |
| Lung_NAPA | 838.6146  | 838.6168  | -2.2             | [ PI-Cer(38:0) +H]+         |
| Lung_NAPA | 838.6146  | 838.6169  | -2.3             | [ HexCer(t40:1) +K]+        |
| Lung_NAPA | 839.7031  | 839.7001  | 3.1              | [ SM(d44:3) +H]+            |
| Lung_NAPA | 840.4338  | 840.4343  | -0.5             | [ PE(38:6) +2K-H]+          |
| Lung_NAPA | 841.6669  | 841.6682  | -1.3             | [ TG(48:2) +K]+             |
| Lung_NAPA | 842.4479  | 842.4499  | -2.0             | [ PE(38:5) +2K-H]+          |
| Lung_NAPA | 843.6822  | 843.6839  | -1.6             | [ TG(48:1) +K]+             |
| Lung_NAPA | 844.4643  | 844.4656  | -1.2             | [ PE(38:4) +2K-H]+          |
| Lung_NAPA | 845.6983  | 845.6995  | -1.2             | [ TG(48:0) +K]+             |
| Lung_NAPA | 848.4908  | 848.4929  | -2.1             | [ Sulfatide(d36:3) +2Na-H]+ |
| Lung_NAPA | 848.5534  | 848.5541  | -0.7             | [ PE 42:6p +2Na-H]+         |
| Lung_NAPA | 848.5534  | 848.5566  | -3.3             | [ PC(38:4) +K]+             |
| Lung_NAPA | 848.6590  | 848.6586  | 0.4              | [ HexCer(d42:2(2OH)) +Na]+  |
| Lung_NAPA | 849.6915  | 849.6943  | -2.8             | [ TG(50:4) +Na]+            |
| Lung_NAPA | 849.6915  | 849.6919  | -0.4             | [ TG(48:1) +2Na-H]+         |
| Lung_NAPA | 850.6763  | 850.6743  | 2.1              | [ HexCer(d42:1(2OH)) +Na]+  |
| Lung_NAPA | 851.7072  | 851.7075  | -0.3             | [ TG(48:0) +2Na-H]+         |
| Lung_NAPA | 851.7072  | 851.7099  | -2.7             | [ TG(50:3) +Na]+            |
| Lung_NAPA | 853.7237  | 853.7256  | -1.9             | [ TG(50:2) +Na]+            |
| Lung_NAPA | 854.5075  | 854.5097  | -2.2             | [ PE(42:8) +K]+             |
| Lung_NAPA | 855.7392  | 855.7412  | -2.1             | [ TG(50:1) +Na]+            |

| Sample    | Meas. m/z | Calc. m/z | $\Delta m$ (mDa) | Tentative identification    |
|-----------|-----------|-----------|------------------|-----------------------------|
| Lung_NAPA | 856.5238  | 856.5253  | -1.5             | [ PE(42:7) +K]+             |
| Lung_NAPA | 858.4550  | 858.4564  | -1.4             | [ Sulfatide(d34:0) +2K-H]+  |
| Lung_NAPA | 863.6995  | 863.6977  | 1.8              | [ SM(d44:2) +Na]+           |
| Lung_NAPA | 865.6671  | 865.6682  | -1.1             | [ TG(50:4) +K]+             |
| Lung_NAPA | 865.7130  | 865.7133  | -0.3             | [ SM(d44:1) +Na]+           |
| Lung_NAPA | 866.4747  | 866.4710  | 3.7              | [ PS(36:1) +2K-H]+          |
| Lung_NAPA | 866.6486  | 866.6482  | 0.4              | [ HexCer(d42:1(2OH)) +K]+   |
| Lung_NAPA | 866.6486  | 866.6481  | 0.5              | [ PI-Cer(40:0) +H]+         |
| Lung_NAPA | 868.4628  | 868.4656  | -2.7             | [ PE(40:6) +2K-H]+          |
| Lung_NAPA | 869.6974  | 869.6995  | -2.1             | [ TG(50:2) +K]+             |
| Lung_NAPA | 871.4310  | 871.4288  | 2.1              | [ PG(38:6) +2K-H]+          |
| Lung_NAPA | 871.7135  | 871.7152  | -1.7             | [ TG(50:1) +K]+             |
| Lung_NAPA | 872.4962  | 872.4969  | -0.6             | [ PE(40:4) +2K-H]+          |
| Lung_NAPA | 875.7083  | 875.7075  | 0.7              | [ TG(50:2) +2Na-H]+         |
| Lung_NAPA | 875.7083  | 875.7123  | -4.1             | [ TG(54:8) +H]+             |
| Lung_NAPA | 875.7083  | 875.7099  | -1.7             | [ TG(52:5) +Na]+            |
| Lung_NAPA | 877.7235  | 877.7256  | -2.0             | [ TG(52:4) +Na]+            |
| Lung_NAPA | 877.7235  | 877.7232  | 0.4              | [ TG(50:1) +2Na-H]+         |
| Lung_NAPA | 879.4530  | 879.4573  | -4.3             | [ PG(42:11) +K]+            |
| Lung_NAPA | 879.7388  | 879.7412  | -2.4             | [ TG(52:3) +Na]+            |
| Lung_NAPA | 879.7388  | 879.7388  | 0.0              | [ TG(50:0) +2Na-H]+         |
| Lung_NAPA | 881.7538  | 881.7569  | -3.1             | [ TG(52:2) +Na]+            |
| Lung_NAPA | 884.6038  | 884.6070  | -3.1             | [ LacCer(d34:1) +Na]+       |
| Lung_NAPA | 885.4656  | 885.4653  | 0.3              | [ PG(42:11) +2Na-H]+        |
| Lung_NAPA | 887.4810  | 887.4810  | 0.1              | [ PG(42:10) +2Na-H]+        |
| Lung_NAPA | 891.6817  | 891.6839  | -2.1             | [ TG(52:5) +K]+             |
| Lung_NAPA | 895.7117  | 895.7152  | -3.4             | [ TG(52:3) +K]+             |
| Lung_NAPA | 897.7278  | 897.7308  | -3.0             | [ TG(52:2) +K]+             |
| Lung_NAPA | 901.7231  | 901.7232  | -0.1             | [ TG(52:3) +2Na-H]+         |
| Lung_NAPA | 901.7231  | 901.7256  | -2.5             | [ TG(54:6) +Na]+            |
| Lung_NAPA | 903.7399  | 903.7388  | 1.1              | [ TG(52:2) +2Na-H]+         |
| Lung_NAPA | 903.7399  | 903.7412  | -1.4             | [ TG(54:5) +Na]+            |
| Lung_NAPA | 903.7399  | 903.7436  | -3.8             | [ TG(56:8) +H]+             |
| Lung_NAPA | 905.7553  | 905.7593  | -3.9             | [ TG(56:7) +H]+             |
| Lung_NAPA | 905.7553  | 905.7545  | 0.9              | [ TG(52:1) +2Na-H]+         |
| Lung_NAPA | 905.7553  | 905.7569  | -1.5             | [ TG(54:4) +Na]+            |
| Lung_NAPA | 907.6761  | 907.6788  | -2.7             | [ 22:1-Glc-cholesterol +K]+ |
| Lung_NAPA | 907.7696  | 907.7725  | -2.9             | [ TG(54:3) +Na]+            |
| Lung_NAPA | 911.4444  | 911.4449  | -0.5             | [ PI(34:2) +2K-H]+          |
| Lung_NAPA | 912.4550  | 912.4554  | -0.3             | [ PS(40:6) +2K-H]+          |
| Lung_NAPA | 915.4736  | 915.4762  | -2.6             | [ PI(34:0) +2K-H]+          |
| Lung_NAPA | 917.4097  | 917.4132  | -3.4             | [ PG(42:11) +2K-H]+         |
| Lung_NAPA | 921.4881  | 921.4890  | -0.9             | [ PI(38:6) +K]+             |
| Lung_NAPA | 923.7434  | 923.7465  | -3.1             | [ TG(54:3) +K]+             |
| Lung_NAPA | 929.7552  | 929.7545  | 0.7              | [ TG(54:3) +2Na-H]+         |
| Lung_NAPA | 929.7552  | 929.7593  | -4.1             | [ TG(58:9) +H]+             |
| Lung_NAPA | 929.7552  | 929.7569  | -1.7             | [ TG(56:6) +Na]+            |

| Sample    | Meas. m/z | Calc. m/z | $\Delta m$ (mDa) | Tentative identification    |
|-----------|-----------|-----------|------------------|-----------------------------|
| Lung_NAPA | 931.7690  | 931.7725  | -3.5             | [ TG(56:5) +Na]+            |
| Lung_NAPA | 931.7690  | 931.7701  | -1.1             | [ TG(54:2) +2Na-H]+         |
| Lung_NAPA | 933.7857  | 933.7858  | -0.1             | [ TG(54:1) +2Na-H]+         |
| Lung_NAPA | 933.7857  | 933.7882  | -2.5             | [ TG(56:4) +Na]+            |
| Lung_NAPA | 935.7992  | 935.8038  | -4.6             | [ TG(56:3) +Na]+            |
| Lung_NAPA | 936.5006  | 936.5034  | -2.8             | [ Sulfatide(d40:3) +2K-H]+  |
| Lung_NAPA | 940.4833  | 940.4867  | -3.4             | [ PS(42:6) +2K-H]+          |
| Lung_NAPA | 945.7283  | 945.7308  | -2.5             | [ TG(56:6) +K]+             |
| Lung_NAPA | 947.7438  | 947.7465  | -2.6             | [ TG(56:5) +K]+             |
| Lung_NAPA | 959.4494  | 959.4449  | 4.5              | [ PI(38:6) +2K-H]+          |
| Lung_NAPA | 963.4742  | 963.4762  | -2.0             | [ PI(38:4) +2K-H]+          |
| Lung_NAPA | 964.6507  | 964.6494  | 1.3              | [ Sulfatide(d44:1) +2Na-H]+ |
| Lung_NAPA | 968.6965  | 968.7009  | -4.4             | [ LacCer(d40:1) +Na]+       |
| Lung_NAPA | 991.5117  | 991.5075  | 4.2              | [ PI(40:4) +2K-H]+          |
| Lung_NAPA | 994.7138  | 994.7165  | -2.7             | [ LacCer(d42:2) +Na]+       |
